# Supplementary material for: Advection (non-climate) impact on the South Pole Ice Core
Source: Copernicus journal article supplement (doi:10.5194/cp-2019-66), 2019-06-19
Supplement: Supplementary file 1 [file SP_Upstream_advection_d18O_dD.xls]

## Sheet: Sheet1
Years since cores collected	Age (years before 1950)	Distance from SPICEcore (m)	Elevation (m)	δ18O correction (‰)	δD correction (‰)
0	-57	0	2803.6	0	0
20	-37	199.999	2803.9	-0.00238268	-0.0172447
40	-17	399.989	2804.2	-0.00476526	-0.0344885
60	3	599.936	2804.49	-0.00714731	-0.0517286
80	23	799.801	2804.79	-0.0095284	-0.0689618
100	43	999.545	2805.09	-0.011908	-0.0861844
120	63	1199.12	2805.39	-0.0142857	-0.103393
140	83	1398.5	2805.68	-0.0166609	-0.120583
160	103	1597.61	2805.98	-0.019033	-0.137752
180	123	1795.28	2806.27	-0.021388	-0.154796
200	143	1992.05	2806.57	-0.0237322	-0.171762
220	163	2188.38	2806.86	-0.0260712	-0.18869
240	183	2384.21	2807.15	-0.0284042	-0.205575
260	203	2579.5	2807.44	-0.0307308	-0.222414
280	223	2774.26	2807.73	-0.033051	-0.239207
300	243	2968.48	2808.02	-0.0353649	-0.255953
320	263	3162.19	2808.31	-0.0376726	-0.272655
340	283	3355.44	2808.6	-0.0399749	-0.289319
360	303	3548.27	2808.88	-0.0422722	-0.305945
380	323	3740.67	2809.17	-0.0445643	-0.322534
400	343	3932.64	2809.46	-0.0468513	-0.339086
420	363	4124.18	2809.74	-0.0491332	-0.355602
440	383	4315.29	2810.03	-0.0514101	-0.37208
460	403	4505.98	2810.31	-0.0536818	-0.388522
480	423	4696.25	2810.59	-0.0559486	-0.404928
500	443	4886.09	2810.88	-0.0582103	-0.421297
520	463	5075.52	2811.16	-0.060467	-0.43763
540	483	5264.52	2811.44	-0.0627187	-0.453926
560	503	5453.11	2811.72	-0.0649654	-0.470187
580	523	5641.27	2812	-0.0672071	-0.486411
600	543	5829	2812.28	-0.0694436	-0.502598
620	563	6016.29	2812.56	-0.0716749	-0.518747
640	583	6203.15	2812.84	-0.073901	-0.534858
660	603	6389.57	2813.12	-0.0761219	-0.550932
680	623	6575.56	2813.39	-0.0783377	-0.566969
700	643	6761.12	2813.67	-0.0805483	-0.582968
720	663	6946.24	2813.94	-0.0827538	-0.59893
740	683	7130.94	2814.22	-0.0849542	-0.614856
760	703	7315.21	2814.49	-0.0871494	-0.630744
780	723	7499.05	2814.77	-0.0893397	-0.646596
800	743	7682.47	2815.04	-0.0915248	-0.662411
820	763	7865.46	2815.31	-0.0937049	-0.678189
840	783	8048.03	2815.58	-0.0958799	-0.693931
860	803	8230.18	2815.86	-0.0980499	-0.709636
880	823	8411.91	2816.13	-0.100215	-0.725306
900	843	8593.22	2816.4	-0.102375	-0.740939
920	863	8774.11	2816.67	-0.10453	-0.756536
940	883	8954.59	2816.94	-0.10668	-0.772097
960	903	9134.65	2817.2	-0.108825	-0.787623
980	923	9314.29	2817.47	-0.110965	-0.803112
1000	943	9493.52	2817.74	-0.113101	-0.818566
1020	963	9672.34	2818	-0.115231	-0.833985
1040	983	9850.75	2818.27	-0.117357	-0.849368
1060	1003	10028.8	2818.53	-0.119477	-0.864716
1080	1023	10206.3	2818.8	-0.121593	-0.880028
1100	1043	10383.5	2819.06	-0.123704	-0.895306
1120	1063	10560.3	2819.33	-0.12581	-0.910549
1140	1083	10736.7	2819.59	-0.127911	-0.925756
1160	1103	10912.7	2819.85	-0.130008	-0.940929
1180	1123	11088.2	2820.11	-0.132099	-0.956068
1200	1143	11263.4	2820.37	-0.134186	-0.971171
1220	1163	11438.2	2820.63	-0.136268	-0.986241
1240	1183	11612.5	2820.89	-0.138345	-1.00128
1260	1203	11786.5	2821.15	-0.140418	-1.01628
1280	1223	11960.1	2821.41	-0.142486	-1.03124
1300	1243	12133.3	2821.67	-0.144549	-1.04617
1320	1263	12306.1	2821.93	-0.146608	-1.06107
1340	1283	12478.5	2822.18	-0.148662	-1.07594
1360	1303	12650.5	2822.44	-0.150711	-1.09077
1380	1323	12822.1	2822.69	-0.152755	-1.10557
1400	1343	12993.3	2822.95	-0.154795	-1.12033
1420	1363	13164.1	2823.2	-0.15683	-1.13506
1440	1383	13334.6	2823.46	-0.158861	-1.14976
1460	1403	13504.6	2823.71	-0.160887	-1.16442
1480	1423	13674.3	2823.96	-0.162909	-1.17905
1500	1443	13843.6	2824.22	-0.164925	-1.19365
1520	1463	14012.6	2824.47	-0.166939	-1.20822
1540	1483	14181.3	2824.72	-0.168949	-1.22277
1560	1503	14349.7	2824.97	-0.170955	-1.23729
1580	1523	14517.8	2825.22	-0.172958	-1.25178
1600	1543	14685.7	2825.47	-0.174957	-1.26625
1620	1563	14853.2	2825.72	-0.176953	-1.2807
1640	1583	15020.5	2825.97	-0.178946	-1.29512
1660	1603	15187.4	2826.22	-0.180935	-1.30952
1680	1623	15354.1	2826.47	-0.18292	-1.32389
1700	1643	15520.4	2826.71	-0.184902	-1.33823
1720	1663	15686.5	2826.96	-0.18688	-1.35254
1740	1683	15852.2	2827.21	-0.188854	-1.36683
1760	1703	16017.6	2827.45	-0.190825	-1.38109
1780	1723	16182.6	2827.7	-0.192791	-1.39533
1800	1743	16347.4	2827.94	-0.194754	-1.40953
1820	1763	16511.8	2828.19	-0.196713	-1.42371
1840	1783	16676	2828.43	-0.198669	-1.43786
1860	1803	16839.8	2828.68	-0.20062	-1.45199
1880	1823	17003.3	2828.92	-0.202568	-1.46609
1900	1843	17166.5	2829.16	-0.204512	-1.48016
1920	1863	17329.4	2829.41	-0.206453	-1.4942
1940	1883	17492	2829.65	-0.20839	-1.50822
1960	1903	17654.2	2829.89	-0.210323	-1.52221
1980	1923	17816.2	2830.13	-0.212253	-1.53618
2000	1943	17977.9	2830.37	-0.214179	-1.55012
2020	1963	18139.2	2830.61	-0.216101	-1.56403
2040	1983	18300.3	2830.85	-0.218019	-1.57792
2060	2003	18461	2831.09	-0.219934	-1.59178
2080	2023	18621.5	2831.33	-0.221846	-1.60561
2100	2043	18781.6	2831.57	-0.223754	-1.61942
2120	2063	18941.4	2831.81	-0.225658	-1.6332
2140	2083	19101	2832.04	-0.227559	-1.64696
2160	2103	19260.2	2832.28	-0.229456	-1.66069
2180	2123	19419.1	2832.52	-0.231349	-1.67439
2200	2143	19577.8	2832.75	-0.233239	-1.68807
2220	2163	19736.1	2832.99	-0.235126	-1.70172
2240	2183	19894.2	2833.23	-0.237009	-1.71535
2260	2203	20051.9	2833.46	-0.238888	-1.72895
2280	2223	20209.4	2833.7	-0.240764	-1.74253
2300	2243	20366.6	2833.93	-0.242636	-1.75608
2320	2263	20523.5	2834.16	-0.244505	-1.76961
2340	2283	20680	2834.4	-0.246371	-1.78311
2360	2303	20836.3	2834.63	-0.248233	-1.79659
2380	2323	20992.3	2834.86	-0.250091	-1.81004
2400	2343	21148.1	2835.09	-0.251947	-1.82346
2420	2363	21303.5	2835.32	-0.253798	-1.83686
2440	2383	21458.6	2835.56	-0.255647	-1.85024
2460	2403	21613.5	2835.79	-0.257491	-1.86359
2480	2423	21768.1	2836.02	-0.259333	-1.87692
2500	2443	21922.4	2836.25	-0.261172	-1.89023
2520	2463	22076.4	2836.48	-0.263007	-1.90351
2540	2483	22230.2	2836.7	-0.264839	-1.91677
2560	2503	22383.7	2836.93	-0.266668	-1.93001
2580	2523	22537	2837.16	-0.268493	-1.94322
2600	2543	22689.9	2837.39	-0.270316	-1.95641
2620	2563	22842.6	2837.62	-0.272135	-1.96958
2640	2583	22995.1	2837.84	-0.273951	-1.98272
2660	2603	23147.3	2838.07	-0.275764	-1.99584
2680	2623	23299.2	2838.3	-0.277574	-2.00894
2700	2643	23450.8	2838.52	-0.27938	-2.02201
2720	2663	23602.2	2838.75	-0.281184	-2.03507
2740	2683	23753.3	2838.97	-0.282984	-2.0481
2760	2703	23904.2	2839.2	-0.284781	-2.06111
2780	2723	24054.8	2839.42	-0.286576	-2.07409
2800	2743	24205.1	2839.65	-0.288367	-2.08705
2820	2763	24355.2	2839.87	-0.290155	-2.1
2840	2783	24505.1	2840.09	-0.29194	-2.11292
2860	2803	24654.6	2840.32	-0.293722	-2.12581
2880	2823	24804	2840.54	-0.295501	-2.13869
2900	2843	24953	2840.76	-0.297277	-2.15154
2920	2863	25101.8	2840.98	-0.29905	-2.16437
2940	2883	25250.4	2841.2	-0.30082	-2.17718
2960	2903	25398.7	2841.42	-0.302587	-2.18997
2980	2923	25546.8	2841.64	-0.30435	-2.20274
3000	2943	25694.6	2841.86	-0.306111	-2.21548
3020	2963	25842.2	2842.08	-0.307869	-2.22821
3040	2983	25989.5	2842.3	-0.309625	-2.24091
3060	3003	26136.5	2842.52	-0.311376	-2.25359
3080	3023	26283.2	2842.74	-0.313124	-2.26624
3100	3043	26429.7	2842.96	-0.314869	-2.27886
3120	3063	26575.8	2843.18	-0.316609	-2.29146
3140	3083	26721.5	2843.39	-0.318346	-2.30403
3160	3103	26867	2843.61	-0.320079	-2.31657
3180	3123	27012.1	2843.83	-0.321808	-2.32909
3200	3143	27157	2844.04	-0.323533	-2.34157
3220	3163	27301.5	2844.26	-0.325255	-2.35403
3240	3183	27445.7	2844.47	-0.326973	-2.36647
3260	3203	27589.6	2844.69	-0.328688	-2.37888
3280	3223	27733.2	2844.9	-0.330398	-2.39126
3300	3243	27876.5	2845.11	-0.332105	-2.40361
3320	3263	28019.4	2845.33	-0.333808	-2.41594
3340	3283	28162.1	2845.54	-0.335508	-2.42824
3360	3303	28304.5	2845.75	-0.337204	-2.44051
3380	3323	28446.5	2845.96	-0.338896	-2.45276
3400	3343	28588.2	2846.17	-0.340585	-2.46498
3420	3363	28729.7	2846.38	-0.34227	-2.47718
3440	3383	28870.8	2846.59	-0.343951	-2.48935
3460	3403	29011.6	2846.8	-0.345629	-2.50149
3480	3423	29152.1	2847.01	-0.347303	-2.5136
3500	3443	29292.4	2847.22	-0.348973	-2.52569
3520	3463	29432.3	2847.43	-0.35064	-2.53776
3540	3483	29571.9	2847.64	-0.352303	-2.5498
3560	3503	29711.2	2847.85	-0.353963	-2.56181
3580	3523	29850.2	2848.05	-0.355619	-2.57379
3600	3543	29988.9	2848.26	-0.357272	-2.58576
3620	3563	30127.3	2848.47	-0.358921	-2.59769
3640	3583	30265.5	2848.67	-0.360566	-2.6096
3660	3603	30403.3	2848.88	-0.362208	-2.62148
3680	3623	30540.8	2849.08	-0.363847	-2.63334
3700	3643	30678	2849.29	-0.365482	-2.64517
3720	3663	30815	2849.49	-0.367113	-2.65698
3740	3683	30951.6	2849.69	-0.368741	-2.66876
3760	3703	31088	2849.9	-0.370365	-2.68052
3780	3723	31224	2850.1	-0.371986	-2.69225
3800	3743	31359.8	2850.3	-0.373603	-2.70395
3820	3763	31495.2	2850.5	-0.375217	-2.71563
3840	3783	31630.4	2850.7	-0.376827	-2.72729
3860	3803	31765.3	2850.9	-0.378434	-2.73892
3880	3823	31899.9	2851.1	-0.380038	-2.75052
3900	3843	32034.2	2851.3	-0.381638	-2.7621
3920	3863	32168.2	2851.5	-0.383234	-2.77366
3940	3883	32301.9	2851.7	-0.384828	-2.78519
3960	3903	32435.4	2851.9	-0.386417	-2.7967
3980	3923	32568.5	2852.1	-0.388004	-2.80818
4000	3943	32701.4	2852.3	-0.389587	-2.81963
4020	3963	32834	2852.5	-0.391166	-2.83106
4040	3983	32966.3	2852.69	-0.392742	-2.84247
4060	4003	33098.3	2852.89	-0.394315	-2.85385
4080	4023	33230	2853.09	-0.395884	-2.86521
4100	4043	33361.5	2853.28	-0.39745	-2.87655
4120	4063	33492.6	2853.48	-0.399013	-2.88786
4140	4083	33623.5	2853.67	-0.400572	-2.89914
4160	4103	33754.1	2853.87	-0.402128	-2.9104
4180	4123	33884.4	2854.06	-0.403681	-2.92164
4200	4143	34014.5	2854.25	-0.40523	-2.93285
4220	4163	34144.3	2854.45	-0.406777	-2.94405
4240	4183	34273.9	2854.64	-0.408321	-2.95522
4260	4203	34403.3	2854.83	-0.409862	-2.96637
4280	4223	34532.4	2855.02	-0.4114	-2.97751
4300	4243	34661.3	2855.22	-0.412935	-2.98862
4320	4263	34789.9	2855.41	-0.414468	-2.99971
4340	4283	34918.3	2855.6	-0.415998	-3.01078
4360	4303	35046.5	2855.79	-0.417525	-3.02183
4380	4323	35174.4	2855.98	-0.419049	-3.03287
4400	4343	35302.1	2856.17	-0.42057	-3.04388
4420	4363	35429.6	2856.36	-0.422089	-3.05487
4440	4383	35556.8	2856.55	-0.423605	-3.06584
4460	4403	35683.8	2856.74	-0.425118	-3.07679
4480	4423	35810.6	2856.93	-0.426628	-3.08772
4500	4443	35937.1	2857.12	-0.428136	-3.09863
4520	4463	36063.5	2857.31	-0.42964	-3.10952
4540	4483	36189.5	2857.49	-0.431143	-3.12039
4560	4503	36315.4	2857.68	-0.432642	-3.13125
4580	4523	36441	2857.87	-0.434138	-3.14208
4600	4543	36566.4	2858.05	-0.435632	-3.15289
4620	4563	36691.6	2858.24	-0.437123	-3.16368
4640	4583	36816.5	2858.43	-0.438612	-3.17445
4660	4603	36941.2	2858.61	-0.440097	-3.1852
4680	4623	37065.7	2858.8	-0.44158	-3.19594
4700	4643	37189.9	2858.98	-0.44306	-3.20665
4720	4663	37313.9	2859.17	-0.444538	-3.21734
4740	4683	37437.7	2859.35	-0.446013	-3.22802
4760	4703	37561.3	2859.54	-0.447485	-3.23867
4780	4723	37684.6	2859.72	-0.448954	-3.24931
4800	4743	37807.7	2859.9	-0.450421	-3.25992
4820	4763	37930.6	2860.09	-0.451885	-3.27052
4840	4783	38053.3	2860.27	-0.453346	-3.28109
4860	4803	38175.7	2860.45	-0.454805	-3.29165
4880	4823	38298	2860.63	-0.456261	-3.30219
4900	4843	38420	2860.81	-0.457715	-3.31271
4920	4863	38541.9	2861	-0.459167	-3.32322
4940	4883	38663.6	2861.18	-0.460617	-3.33371
4960	4903	38785	2861.36	-0.462064	-3.34419
4980	4923	38906.3	2861.54	-0.463509	-3.35465
5000	4943	39027.4	2861.72	-0.464952	-3.36509
5020	4963	39148.3	2861.9	-0.466392	-3.37551
5040	4983	39269.1	2862.08	-0.46783	-3.38592
5060	5003	39389.6	2862.26	-0.469266	-3.39632
5080	5023	39510	2862.44	-0.4707	-3.40669
5100	5043	39630.1	2862.62	-0.472132	-3.41705
5120	5063	39750.1	2862.8	-0.473561	-3.4274
5140	5083	39869.9	2862.97	-0.474988	-3.43773
5160	5103	39989.5	2863.15	-0.476413	-3.44804
5180	5123	40108.9	2863.33	-0.477836	-3.45834
5200	5143	40228.1	2863.51	-0.479256	-3.46862
5220	5163	40347.2	2863.68	-0.480674	-3.47888
5240	5183	40466	2863.86	-0.48209	-3.48913
5260	5203	40584.7	2864.04	-0.483504	-3.49936
5280	5223	40703.2	2864.21	-0.484916	-3.50958
5300	5243	40821.5	2864.39	-0.486325	-3.51978
5320	5263	40939.6	2864.57	-0.487732	-3.52996
5340	5283	41057.5	2864.74	-0.489137	-3.54013
5360	5303	41175.3	2864.92	-0.49054	-3.55028
5380	5323	41292.8	2865.09	-0.491941	-3.56042
5400	5343	41410.3	2865.27	-0.49334	-3.57055
5420	5363	41527.6	2865.44	-0.494737	-3.58066
5440	5383	41644.8	2865.62	-0.496133	-3.59077
5460	5403	41761.9	2865.79	-0.497528	-3.60086
5480	5423	41878.8	2865.97	-0.498922	-3.61094
5500	5443	41995.7	2866.14	-0.500313	-3.62102
5520	5463	42112.4	2866.31	-0.501704	-3.63108
5540	5483	42229	2866.49	-0.503093	-3.64114
5560	5503	42345.4	2866.66	-0.504481	-3.65118
5580	5523	42461.8	2866.83	-0.505867	-3.66121
5600	5543	42578	2867.01	-0.507252	-3.67123
5620	5563	42694.2	2867.18	-0.508635	-3.68125
5640	5583	42810.1	2867.35	-0.510017	-3.69125
5660	5603	42926	2867.52	-0.511397	-3.70124
5680	5623	43041.8	2867.7	-0.512777	-3.71122
5700	5643	43157.4	2867.87	-0.514154	-3.72119
5720	5663	43273	2868.04	-0.515531	-3.73115
5740	5683	43388.4	2868.21	-0.516905	-3.7411
5760	5703	43503.6	2868.38	-0.518279	-3.75104
5780	5723	43618.8	2868.56	-0.519651	-3.76097
5800	5743	43733.9	2868.73	-0.521022	-3.77089
5820	5763	43848.8	2868.9	-0.522391	-3.7808
5840	5783	43963.6	2869.07	-0.523759	-3.7907
5860	5803	44078.3	2869.24	-0.525125	-3.80059
5880	5823	44192.9	2869.41	-0.52649	-3.81047
5900	5843	44307.3	2869.58	-0.527854	-3.82034
5920	5863	44421.7	2869.75	-0.529216	-3.8302
5940	5883	44535.9	2869.92	-0.530577	-3.84005
5960	5903	44650	2870.09	-0.531936	-3.84989
5980	5923	44764	2870.26	-0.533294	-3.85972
6000	5943	44877.9	2870.43	-0.534651	-3.86954
6020	5963	44991.7	2870.6	-0.536006	-3.87934
6040	5983	45105.3	2870.77	-0.53736	-3.88914
6060	6003	45218.8	2870.94	-0.538713	-3.89893
6080	6023	45332.2	2871.11	-0.540064	-3.90871
6100	6043	45445.5	2871.28	-0.541413	-3.91848
6120	6063	45558.7	2871.45	-0.542762	-3.92824
6140	6083	45671.8	2871.61	-0.544109	-3.93799
6160	6103	45784.7	2871.78	-0.545454	-3.94772
6180	6123	45897.5	2871.95	-0.546798	-3.95745
6200	6143	46010.3	2872.12	-0.548141	-3.96717
6220	6163	46122.9	2872.29	-0.549483	-3.97688
6240	6183	46235.3	2872.45	-0.550823	-3.98658
6260	6203	46347.7	2872.62	-0.552161	-3.99627
6280	6223	46460	2872.79	-0.553499	-4.00595
6300	6243	46572.1	2872.95	-0.554835	-4.01562
6320	6263	46684.1	2873.12	-0.556169	-4.02527
6340	6283	46796	2873.29	-0.557502	-4.03492
6360	6303	46907.8	2873.45	-0.558834	-4.04456
6380	6323	47019.5	2873.62	-0.560165	-4.05419
6400	6343	47131.1	2873.79	-0.561494	-4.06381
6420	6363	47242.5	2873.95	-0.562822	-4.07342
6440	6383	47353.8	2874.12	-0.564148	-4.08302
6460	6403	47465.1	2874.28	-0.565473	-4.09261
6480	6423	47576.2	2874.45	-0.566797	-4.10219
6500	6443	47687.2	2874.61	-0.568119	-4.11176
6520	6463	47798	2874.78	-0.56944	-4.12132
6540	6483	47908.8	2874.94	-0.57076	-4.13087
6560	6503	48019.5	2875.11	-0.572078	-4.14041
6580	6523	48130	2875.27	-0.573395	-4.14994
6600	6543	48240.4	2875.44	-0.57471	-4.15947
6620	6563	48350.7	2875.6	-0.576024	-4.16898
6640	6583	48460.9	2875.77	-0.577337	-4.17848
6660	6603	48571	2875.93	-0.578649	-4.18797
6680	6623	48681	2876.09	-0.579959	-4.19745
6700	6643	48790.9	2876.26	-0.581268	-4.20693
6720	6663	48900.6	2876.42	-0.582575	-4.21639
6740	6683	49010.2	2876.59	-0.583881	-4.22584
6760	6703	49119.8	2876.75	-0.585186	-4.23529
6780	6723	49229.2	2876.91	-0.58649	-4.24472
6800	6743	49338.5	2877.07	-0.587792	-4.25414
6820	6763	49447.7	2877.24	-0.589093	-4.26356
6840	6783	49556.7	2877.4	-0.590392	-4.27296
6860	6803	49665.7	2877.56	-0.59169	-4.28236
6880	6823	49774.6	2877.72	-0.592987	-4.29174
6900	6843	49883.3	2877.89	-0.594283	-4.30112
6920	6863	49991.9	2878.05	-0.595577	-4.31049
6940	6883	50100.4	2878.21	-0.596869	-4.31984
6960	6903	50208.8	2878.37	-0.598161	-4.32919
6980	6923	50317.1	2878.53	-0.599451	-4.33853
7000	6943	50425.2	2878.69	-0.600739	-4.34785
7020	6963	50533.2	2878.85	-0.602025	-4.35716
7040	6983	50640.9	2879.01	-0.603309	-4.36645
7060	7003	50748.5	2879.17	-0.60459	-4.37572
7080	7023	50855.9	2879.33	-0.60587	-4.38498
7100	7043	50963.1	2879.49	-0.607147	-4.39423
7120	7063	51070.2	2879.65	-0.608422	-4.40346
7140	7083	51177	2879.81	-0.609695	-4.41267
7160	7103	51283.7	2879.97	-0.610966	-4.42187
7180	7123	51390.2	2880.13	-0.612235	-4.43105
7200	7143	51496.5	2880.29	-0.613502	-4.44022
7220	7163	51602.7	2880.45	-0.614766	-4.44937
7240	7183	51708.6	2880.6	-0.616029	-4.45851
7260	7203	51814.4	2880.76	-0.617289	-4.46763
7280	7223	51920.1	2880.92	-0.618547	-4.47674
7300	7243	52025.5	2881.08	-0.619804	-4.48583
7320	7263	52130.8	2881.23	-0.621058	-4.49491
7340	7283	52235.9	2881.39	-0.62231	-4.50397
7360	7303	52340.8	2881.54	-0.62356	-4.51301
7380	7323	52445.5	2881.7	-0.624808	-4.52204
7400	7343	52550.1	2881.86	-0.626053	-4.53106
7420	7363	52654.5	2882.01	-0.627297	-4.54006
7440	7383	52758.7	2882.17	-0.628539	-4.54905
7460	7403	52862.8	2882.32	-0.629778	-4.55802
7480	7423	52966.6	2882.48	-0.631016	-4.56698
7500	7443	53070.3	2882.63	-0.632251	-4.57592
7520	7463	53173.9	2882.79	-0.633485	-4.58484
7540	7483	53277.2	2882.94	-0.634716	-4.59376
7560	7503	53380.4	2883.09	-0.635945	-4.60265
7580	7523	53483.4	2883.25	-0.637173	-4.61154
7600	7543	53586.3	2883.4	-0.638398	-4.6204
7620	7563	53688.9	2883.55	-0.639621	-4.62926
7640	7583	53791.4	2883.71	-0.640842	-4.63809
7660	7603	53893.8	2883.86	-0.642061	-4.64692
7680	7623	53995.9	2884.01	-0.643278	-4.65572
7700	7643	54097.9	2884.16	-0.644493	-4.66451
7720	7663	54199.6	2884.31	-0.645705	-4.67329
7740	7683	54301.2	2884.46	-0.646915	-4.68205
7760	7703	54402.7	2884.62	-0.648124	-4.6908
7780	7723	54503.9	2884.77	-0.64933	-4.69952
7800	7743	54604.9	2884.92	-0.650534	-4.70824
7820	7763	54705.8	2885.07	-0.651736	-4.71694
7840	7783	54806.5	2885.22	-0.652935	-4.72562
7860	7803	54907.1	2885.37	-0.654133	-4.73429
7880	7823	55007.4	2885.52	-0.655328	-4.74294
7900	7843	55107.6	2885.67	-0.656522	-4.75158
7920	7863	55207.6	2885.81	-0.657713	-4.7602
7940	7883	55307.4	2885.96	-0.658902	-4.7688
7960	7903	55407	2886.11	-0.660089	-4.7774
7980	7923	55506.5	2886.26	-0.661274	-4.78597
8000	7943	55605.8	2886.41	-0.662457	-4.79453
8020	7963	55704.9	2886.55	-0.663638	-4.80308
8040	7983	55803.8	2886.7	-0.664817	-4.81161
8060	8003	55902.6	2886.85	-0.665993	-4.82013
8080	8023	56001.2	2887	-0.667168	-4.82863
8100	8043	56099.6	2887.14	-0.66834	-4.83711
8120	8063	56197.8	2887.29	-0.669511	-4.84558
8140	8083	56295.9	2887.43	-0.670679	-4.85404
8160	8103	56393.8	2887.58	-0.671845	-4.86248
8180	8123	56491.5	2887.73	-0.67301	-4.87091
8200	8143	56589.1	2887.87	-0.674172	-4.87932
8220	8163	56686.5	2888.02	-0.675332	-4.88771
8240	8183	56783.7	2888.16	-0.67649	-4.8961
8260	8203	56880.7	2888.31	-0.677646	-4.90446
8280	8223	56977.6	2888.45	-0.6788	-4.91282
8300	8243	57074.3	2888.59	-0.679952	-4.92115
8320	8263	57170.8	2888.74	-0.681102	-4.92948
8340	8283	57267.2	2888.88	-0.68225	-4.93778
8360	8303	57363.4	2889.02	-0.683396	-4.94608
8380	8323	57459.4	2889.17	-0.68454	-4.95436
8400	8343	57555.2	2889.31	-0.685682	-4.96262
8420	8363	57650.9	2889.45	-0.686822	-4.97087
8440	8383	57746.4	2889.59	-0.68796	-4.97911
8460	8403	57841.8	2889.74	-0.689095	-4.98733
8480	8423	57936.9	2889.88	-0.690229	-4.99554
8500	8443	58032	2890.02	-0.691361	-5.00373
8520	8463	58126.8	2890.16	-0.692491	-5.01191
8540	8483	58221.5	2890.3	-0.693619	-5.02007
8560	8503	58316	2890.44	-0.694745	-5.02822
8580	8523	58410.3	2890.58	-0.695869	-5.03635
8600	8543	58504.5	2890.72	-0.696991	-5.04447
8620	8563	58598.5	2890.86	-0.698111	-5.05258
8640	8583	58692.4	2891	-0.699229	-5.06067
8660	8603	58786.1	2891.14	-0.700345	-5.06875
8680	8623	58879.6	2891.28	-0.70146	-5.07681
8700	8643	58972.9	2891.42	-0.702572	-5.08486
8720	8663	59066.1	2891.56	-0.703682	-5.0929
8740	8683	59159.2	2891.7	-0.70479	-5.10092
8760	8703	59252	2891.84	-0.705897	-5.10893
8780	8723	59344.7	2891.98	-0.707001	-5.11692
8800	8743	59437.3	2892.11	-0.708104	-5.1249
8820	8763	59529.7	2892.25	-0.709204	-5.13287
8840	8783	59621.9	2892.39	-0.710303	-5.14082
8860	8803	59713.9	2892.52	-0.7114	-5.14875
8880	8823	59805.8	2892.66	-0.712494	-5.15668
8900	8843	59897.6	2892.8	-0.713587	-5.16459
8920	8863	59989.1	2892.93	-0.714678	-5.17248
8940	8883	60080.6	2893.07	-0.715767	-5.18037
8960	8903	60171.8	2893.21	-0.716854	-5.18823
8980	8923	60262.9	2893.34	-0.71794	-5.19609
9000	8943	60353.8	2893.48	-0.719023	-5.20393
9020	8963	60444.6	2893.61	-0.720104	-5.21176
9040	8983	60535.2	2893.75	-0.721184	-5.21957
9060	9003	60625.7	2893.88	-0.722262	-5.22737
9080	9023	60716	2894.02	-0.723337	-5.23516
9100	9043	60806.1	2894.15	-0.724411	-5.24293
9120	9063	60896.1	2894.29	-0.725483	-5.25069
9140	9083	60986	2894.42	-0.726554	-5.25843
9160	9103	61075.6	2894.55	-0.727622	-5.26616
9180	9123	61165.1	2894.69	-0.728688	-5.27388
9200	9143	61254.5	2894.82	-0.729753	-5.28159
9220	9163	61343.7	2894.95	-0.730816	-5.28928
9240	9183	61432.8	2895.08	-0.731877	-5.29696
9260	9203	61521.6	2895.22	-0.732936	-5.30462
9280	9223	61610.4	2895.35	-0.733993	-5.31227
9300	9243	61699	2895.48	-0.735048	-5.31991
9320	9263	61787.4	2895.61	-0.736102	-5.32753
9340	9283	61875.7	2895.74	-0.737153	-5.33515
9360	9303	61963.8	2895.88	-0.738203	-5.34274
9380	9323	62051.8	2896.01	-0.739251	-5.35033
9400	9343	62139.6	2896.14	-0.740297	-5.3579
9420	9363	62227.2	2896.27	-0.741341	-5.36546
9440	9383	62314.7	2896.4	-0.742384	-5.373
9460	9403	62402.1	2896.53	-0.743425	-5.38054
9480	9423	62489.3	2896.66	-0.744464	-5.38806
9500	9443	62576.4	2896.79	-0.745501	-5.39556
9520	9463	62663.3	2896.92	-0.746537	-5.40306
9540	9483	62750.2	2897.05	-0.747571	-5.41055
9560	9503	62836.9	2897.18	-0.748604	-5.41802
9580	9523	62923.4	2897.3	-0.749636	-5.42549
9600	9543	63009.9	2897.43	-0.750665	-5.43294
9620	9563	63096.2	2897.56	-0.751694	-5.44038
9640	9583	63182.4	2897.69	-0.75272	-5.44781
9660	9603	63268.4	2897.82	-0.753745	-5.45523
9680	9623	63354.3	2897.95	-0.754769	-5.46264
9700	9643	63440.1	2898.07	-0.755791	-5.47004
9720	9663	63525.8	2898.2	-0.756812	-5.47742
9740	9683	63611.3	2898.33	-0.757831	-5.4848
9760	9703	63696.7	2898.46	-0.758848	-5.49216
9780	9723	63782	2898.58	-0.759864	-5.49952
9800	9743	63867.2	2898.71	-0.760879	-5.50686
9820	9763	63952.2	2898.84	-0.761892	-5.51419
9840	9783	64037.1	2898.96	-0.762903	-5.52151
9860	9803	64121.9	2899.09	-0.763913	-5.52882
9880	9823	64206.5	2899.22	-0.764922	-5.53612
9900	9843	64291.1	2899.34	-0.765929	-5.54341
9920	9863	64375.5	2899.47	-0.766934	-5.55069
9940	9883	64459.7	2899.59	-0.767938	-5.55795
9960	9903	64543.9	2899.72	-0.768941	-5.56521
9980	9923	64627.9	2899.84	-0.769942	-5.57245
10000	9943	64711.8	2899.97	-0.770941	-5.57969
10020	9963	64795.6	2900.09	-0.771939	-5.58691
10040	9983	64879.3	2900.22	-0.772937	-5.59413
10060	10003	64962.9	2900.34	-0.773933	-5.60134
10080	10023	65046.4	2900.47	-0.774928	-5.60854
10100	10043	65129.8	2900.59	-0.775921	-5.61573
10120	10063	65213.1	2900.71	-0.776914	-5.62292
10140	10083	65296.4	2900.84	-0.777906	-5.63009
10160	10103	65379.5	2900.96	-0.778896	-5.63726
10180	10123	65462.6	2901.09	-0.779886	-5.64442
10200	10143	65545.5	2901.21	-0.780874	-5.65157
10220	10163	65628.4	2901.33	-0.781861	-5.65872
10240	10183	65711.2	2901.46	-0.782847	-5.66586
10260	10203	65793.9	2901.58	-0.783832	-5.67299
10280	10223	65876.4	2901.7	-0.784816	-5.68011
10300	10243	65958.9	2901.82	-0.785799	-5.68722
10320	10263	66041.4	2901.95	-0.786781	-5.69433
10340	10283	66123.7	2902.07	-0.787762	-5.70142
10360	10303	66205.9	2902.19	-0.788741	-5.70851
10380	10323	66288	2902.31	-0.78972	-5.7156
10400	10343	66370.1	2902.44	-0.790697	-5.72267
10420	10363	66452	2902.56	-0.791673	-5.72974
10440	10383	66533.9	2902.68	-0.792649	-5.7368
10460	10403	66615.7	2902.8	-0.793623	-5.74385
10480	10423	66697.3	2902.92	-0.794596	-5.75089
10500	10443	66778.9	2903.05	-0.795568	-5.75792
10520	10463	66860.4	2903.17	-0.796539	-5.76495
10540	10483	66941.8	2903.29	-0.797509	-5.77197
10560	10503	67023.2	2903.41	-0.798478	-5.77898
10580	10523	67104.4	2903.53	-0.799445	-5.78599
10600	10543	67185.5	2903.65	-0.800412	-5.79298
10620	10563	67266.6	2903.77	-0.801378	-5.79997
10640	10583	67347.5	2903.89	-0.802342	-5.80695
10660	10603	67428.4	2904.01	-0.803306	-5.81392
10680	10623	67509.2	2904.13	-0.804268	-5.82089
10700	10643	67589.9	2904.25	-0.805229	-5.82785
10720	10663	67670.5	2904.37	-0.806189	-5.8348
10740	10683	67751	2904.49	-0.807149	-5.84174
10760	10703	67831.4	2904.61	-0.808107	-5.84867
10780	10723	67911.8	2904.73	-0.809064	-5.8556
10800	10743	67992	2904.85	-0.81002	-5.86252
10820	10763	68072.2	2904.97	-0.810975	-5.86943
10840	10783	68152.2	2905.09	-0.811929	-5.87633
10860	10803	68232.2	2905.21	-0.812881	-5.88323
10880	10823	68312.1	2905.33	-0.813833	-5.89012
10900	10843	68391.9	2905.45	-0.814784	-5.897
10920	10863	68471.6	2905.57	-0.815733	-5.90387
10940	10883	68551.2	2905.69	-0.816682	-5.91074
10960	10903	68630.8	2905.8	-0.81763	-5.91759
10980	10923	68710.2	2905.92	-0.818576	-5.92444
11000	10943	68789.6	2906.04	-0.819522	-5.93129
11020	10963	68868.8	2906.16	-0.820466	-5.93812
11040	10983	68948	2906.28	-0.821409	-5.94495
11060	11003	69027.1	2906.39	-0.822352	-5.95177
11080	11023	69106.1	2906.51	-0.823293	-5.95858
11100	11043	69185	2906.63	-0.824233	-5.96539
11120	11063	69263.9	2906.75	-0.825172	-5.97218
11140	11083	69342.6	2906.86	-0.82611	-5.97897
11160	11103	69421.3	2906.98	-0.827047	-5.98576
11180	11123	69499.8	2907.1	-0.827983	-5.99253
11200	11143	69578.3	2907.21	-0.828918	-5.9993
11220	11163	69656.7	2907.33	-0.829852	-6.00606
11240	11183	69735	2907.45	-0.830785	-6.01281
11260	11203	69813.2	2907.56	-0.831717	-6.01955
11280	11223	69891.4	2907.68	-0.832648	-6.02629
11300	11243	69969.4	2907.8	-0.833578	-6.03302
11320	11263	70047.4	2907.91	-0.834507	-6.03974
11340	11283	70125.3	2908.03	-0.835434	-6.04646
11360	11303	70203.1	2908.15	-0.836361	-6.05316
11380	11323	70280.8	2908.26	-0.837287	-6.05986
11400	11343	70358.4	2908.38	-0.838211	-6.06656
11420	11363	70435.9	2908.49	-0.839135	-6.07324
11440	11383	70513.3	2908.61	-0.840058	-6.07992
11460	11403	70590.7	2908.72	-0.840979	-6.08659
11480	11423	70668	2908.84	-0.8419	-6.09325
11500	11443	70745.2	2908.95	-0.84282	-6.09991
11520	11463	70822.3	2909.07	-0.843738	-6.10656
11540	11483	70899.3	2909.18	-0.844656	-6.1132
11560	11503	70976.3	2909.3	-0.845573	-6.11983
11580	11523	71053.2	2909.41	-0.846489	-6.12646
11600	11543	71130	2909.53	-0.847404	-6.13308
11620	11563	71206.7	2909.64	-0.848318	-6.1397
11640	11583	71283.3	2909.75	-0.849231	-6.14631
11660	11603	71359.9	2909.87	-0.850143	-6.15291
11680	11623	71436.3	2909.98	-0.851054	-6.1595
11700	11643	71512.7	2910.1	-0.851964	-6.16609
11720	11663	71589	2910.21	-0.852873	-6.17267
11740	11683	71665.3	2910.32	-0.853781	-6.17924
11760	11703	71741.4	2910.44	-0.854689	-6.18581
11780	11723	71817.5	2910.55	-0.855595	-6.19237
11800	11743	71893.5	2910.66	-0.8565	-6.19892
11820	11763	71969.4	2910.78	-0.857405	-6.20547
11840	11783	72045.3	2910.89	-0.858308	-6.21201
11860	11803	72121	2911	-0.859211	-6.21854
11880	11823	72196.7	2911.11	-0.860113	-6.22507
11900	11843	72272.3	2911.23	-0.861013	-6.23158
11920	11863	72347.9	2911.34	-0.861913	-6.2381
11940	11883	72423.3	2911.45	-0.862812	-6.2446
11960	11903	72498.7	2911.56	-0.86371	-6.2511
11980	11923	72574	2911.68	-0.864607	-6.25759
12000	11943	72649.2	2911.79	-0.865503	-6.26408
12020	11963	72724.3	2911.9	-0.866398	-6.27056
12040	11983	72799.4	2912.01	-0.867292	-6.27703
12060	12003	72874.3	2912.12	-0.868185	-6.28349
12080	12023	72949.2	2912.23	-0.869078	-6.28995
12100	12043	73024.1	2912.35	-0.869969	-6.2964
12120	12063	73098.8	2912.46	-0.87086	-6.30285
12140	12083	73173.5	2912.57	-0.871749	-6.30928
12160	12103	73248.1	2912.68	-0.872638	-6.31572
12180	12123	73322.6	2912.79	-0.873525	-6.32214
12200	12143	73397	2912.9	-0.874412	-6.32856
12220	12163	73471.4	2913.01	-0.875298	-6.33497
12240	12183	73545.6	2913.12	-0.876183	-6.34137
12260	12203	73619.8	2913.23	-0.877067	-6.34777
12280	12223	73694	2913.34	-0.87795	-6.35416
12300	12243	73768	2913.45	-0.878832	-6.36055
12320	12263	73842	2913.56	-0.879713	-6.36693
12340	12283	73915.9	2913.67	-0.880594	-6.3733
12360	12303	73989.7	2913.78	-0.881473	-6.37966
12380	12323	74063.4	2913.89	-0.882352	-6.38602
12400	12343	74137.1	2914	-0.883229	-6.39237
12420	12363	74210.7	2914.11	-0.884106	-6.39872
12440	12383	74284.2	2914.22	-0.884982	-6.40506
12460	12403	74357.6	2914.33	-0.885857	-6.41139
12480	12423	74431	2914.44	-0.886731	-6.41771
12500	12443	74504.3	2914.55	-0.887604	-6.42403
12520	12463	74577.5	2914.66	-0.888476	-6.43034
12540	12483	74650.6	2914.77	-0.889347	-6.43665
12560	12503	74723.7	2914.88	-0.890217	-6.44295
12580	12523	74796.7	2914.99	-0.891087	-6.44924
12600	12543	74869.6	2915.09	-0.891955	-6.45553
12620	12563	74942.4	2915.2	-0.892823	-6.46181
12640	12583	75015.1	2915.31	-0.89369	-6.46808
12660	12603	75087.8	2915.42	-0.894556	-6.47435
12680	12623	75160.4	2915.53	-0.895421	-6.48061
12700	12643	75233	2915.64	-0.896285	-6.48686
12720	12663	75305.4	2915.74	-0.897148	-6.49311
12740	12683	75377.8	2915.85	-0.89801	-6.49935
12760	12703	75450.1	2915.96	-0.898871	-6.50558
12780	12723	75522.3	2916.07	-0.899732	-6.51181
12800	12743	75594.5	2916.17	-0.900591	-6.51803
12820	12763	75666.5	2916.28	-0.90145	-6.52425
12840	12783	75738.5	2916.39	-0.902308	-6.53045
12860	12803	75810.5	2916.5	-0.903165	-6.53666
12880	12823	75882.3	2916.6	-0.904021	-6.54285
12900	12843	75954.1	2916.71	-0.904876	-6.54904
12920	12863	76025.8	2916.82	-0.90573	-6.55522
12940	12883	76097.4	2916.92	-0.906584	-6.5614
12960	12903	76169	2917.03	-0.907436	-6.56757
12980	12923	76240.5	2917.14	-0.908288	-6.57373
13000	12943	76311.9	2917.24	-0.909138	-6.57989
13020	12963	76383.2	2917.35	-0.909988	-6.58604
13040	12983	76454.5	2917.45	-0.910837	-6.59219
13060	13003	76525.7	2917.56	-0.911685	-6.59832
13080	13023	76596.8	2917.67	-0.912533	-6.60446
13100	13043	76667.8	2917.77	-0.913379	-6.61058
13120	13063	76738.8	2917.88	-0.914224	-6.6167
13140	13083	76809.7	2917.98	-0.915069	-6.62281
13160	13103	76880.5	2918.09	-0.915913	-6.62892
13180	13123	76951.3	2918.19	-0.916756	-6.63502
13200	13143	77021.9	2918.3	-0.917598	-6.64111
13220	13163	77092.5	2918.4	-0.918439	-6.6472
13240	13183	77163.1	2918.51	-0.919279	-6.65328
13260	13203	77233.5	2918.61	-0.920118	-6.65936
13280	13223	77303.9	2918.72	-0.920957	-6.66543
13300	13243	77374.2	2918.82	-0.921795	-6.67149
13320	13263	77444.5	2918.93	-0.922632	-6.67755
13340	13283	77514.7	2919.03	-0.923468	-6.6836
13360	13303	77584.8	2919.14	-0.924304	-6.68965
13380	13323	77654.9	2919.24	-0.925138	-6.69569
13400	13343	77724.9	2919.35	-0.925972	-6.70172
13420	13363	77794.8	2919.45	-0.926806	-6.70775
13440	13383	77864.7	2919.55	-0.927638	-6.71378
13460	13403	77934.5	2919.66	-0.92847	-6.7198
13480	13423	78004.3	2919.76	-0.929301	-6.72581
13500	13443	78074	2919.87	-0.930131	-6.73182
13520	13463	78143.6	2919.97	-0.93096	-6.73783
13540	13483	78213.1	2920.07	-0.931789	-6.74382
13560	13503	78282.6	2920.18	-0.932617	-6.74982
13580	13523	78352.1	2920.28	-0.933444	-6.7558
13600	13543	78421.5	2920.38	-0.934271	-6.76178
13620	13563	78490.8	2920.49	-0.935096	-6.76776
13640	13583	78560	2920.59	-0.935921	-6.77373
13660	13603	78629.2	2920.69	-0.936746	-6.7797
13680	13623	78698.3	2920.8	-0.937569	-6.78566
13700	13643	78767.4	2920.9	-0.938392	-6.79161
13720	13663	78836.4	2921	-0.939214	-6.79756
13740	13683	78905.3	2921.1	-0.940035	-6.8035
13760	13703	78974.2	2921.21	-0.940856	-6.80944
13780	13723	79043	2921.31	-0.941675	-6.81537
13800	13743	79111.7	2921.41	-0.942494	-6.8213
13820	13763	79180.4	2921.51	-0.943313	-6.82723
13840	13783	79249.1	2921.62	-0.94413	-6.83314
13860	13803	79317.6	2921.72	-0.944947	-6.83905
13880	13823	79386.1	2921.82	-0.945763	-6.84496
13900	13843	79454.6	2921.92	-0.946579	-6.85086
13920	13863	79522.9	2922.02	-0.947393	-6.85676
13940	13883	79591.3	2922.13	-0.948207	-6.86265
13960	13903	79659.5	2922.23	-0.94902	-6.86853
13980	13923	79727.7	2922.33	-0.949833	-6.87441
14000	13943	79795.9	2922.43	-0.950645	-6.88029
14020	13963	79863.9	2922.53	-0.951456	-6.88616
14040	13983	79931.9	2922.63	-0.952266	-6.89202
14060	14003	79999.9	2922.73	-0.953075	-6.89788
14080	14023	80067.8	2922.84	-0.953884	-6.90374
14100	14043	80135.6	2922.94	-0.954692	-6.90959
14120	14063	80203.4	2923.04	-0.9555	-6.91543
14140	14083	80271.1	2923.14	-0.956307	-6.92127
14160	14103	80338.8	2923.24	-0.957113	-6.9271
14180	14123	80406.4	2923.34	-0.957918	-6.93293
14200	14143	80473.9	2923.44	-0.958722	-6.93875
14220	14163	80541.4	2923.54	-0.959526	-6.94457
14240	14183	80608.8	2923.64	-0.960329	-6.95038
14260	14203	80676.1	2923.74	-0.961132	-6.95619
14280	14223	80743.4	2923.84	-0.961934	-6.96199
14300	14243	80810.7	2923.94	-0.962735	-6.96779
14320	14263	80877.9	2924.04	-0.963535	-6.97358
14340	14283	80945	2924.14	-0.964334	-6.97937
14360	14303	81012	2924.24	-0.965133	-6.98515
14380	14323	81079	2924.34	-0.965932	-6.99093
14400	14343	81146	2924.44	-0.966729	-6.9967
14420	14363	81212.9	2924.54	-0.967526	-7.00247
14440	14383	81279.7	2924.64	-0.968322	-7.00823
14460	14403	81346.4	2924.74	-0.969117	-7.01399
14480	14423	81413.1	2924.84	-0.969912	-7.01974
14500	14443	81479.8	2924.94	-0.970706	-7.02549
14520	14463	81546.4	2925.04	-0.971499	-7.03123
14540	14483	81612.9	2925.14	-0.972292	-7.03696
14560	14503	81679.4	2925.24	-0.973084	-7.0427
14580	14523	81745.8	2925.33	-0.973875	-7.04842
14600	14543	81812.2	2925.43	-0.974666	-7.05414
14620	14563	81878.5	2925.53	-0.975456	-7.05986
14640	14583	81944.7	2925.63	-0.976245	-7.06557
14660	14603	82010.9	2925.73	-0.977033	-7.07128
14680	14623	82077	2925.83	-0.977821	-7.07698
14700	14643	82143.1	2925.93	-0.978608	-7.08268
14720	14663	82209.1	2926.02	-0.979395	-7.08837
14740	14683	82275.1	2926.12	-0.98018	-7.09406
14760	14703	82341	2926.22	-0.980965	-7.09974
14780	14723	82406.8	2926.32	-0.98175	-7.10541
14800	14743	82472.6	2926.42	-0.982534	-7.11109
14820	14763	82538.3	2926.51	-0.983317	-7.11675
14840	14783	82604	2926.61	-0.984099	-7.12242
14860	14803	82669.6	2926.71	-0.984881	-7.12807
14880	14823	82735.2	2926.81	-0.985662	-7.13373
14900	14843	82800.7	2926.91	-0.986442	-7.13937
14920	14863	82866.1	2927	-0.987222	-7.14502
14940	14883	82931.5	2927.1	-0.988001	-7.15066
14960	14903	82996.8	2927.2	-0.988779	-7.15629
14980	14923	83062.1	2927.29	-0.989557	-7.16192
15000	14943	83127.3	2927.39	-0.990334	-7.16754
15020	14963	83192.5	2927.49	-0.99111	-7.17316
15040	14983	83257.6	2927.59	-0.991886	-7.17877
15060	15003	83322.7	2927.68	-0.992661	-7.18438
15080	15023	83387.7	2927.78	-0.993435	-7.18999
15100	15043	83452.6	2927.88	-0.994209	-7.19559
15120	15063	83517.5	2927.97	-0.994982	-7.20118
15140	15083	83582.3	2928.07	-0.995755	-7.20677
15160	15103	83647.1	2928.17	-0.996526	-7.21236
15180	15123	83711.8	2928.26	-0.997297	-7.21794
15200	15143	83776.5	2928.36	-0.998068	-7.22352
15220	15163	83841.1	2928.45	-0.998838	-7.22909
15240	15183	83905.7	2928.55	-0.999607	-7.23465
15260	15203	83970.2	2928.65	-1.00038	-7.24022
15280	15223	84034.6	2928.74	-1.00114	-7.24577
15300	15243	84099	2928.84	-1.00191	-7.25133
15320	15263	84163.4	2928.93	-1.00268	-7.25687
15340	15283	84227.7	2929.03	-1.00344	-7.26242
15360	15303	84291.9	2929.13	-1.00421	-7.26796
15380	15323	84356.1	2929.22	-1.00497	-7.27349
15400	15343	84420.2	2929.32	-1.00574	-7.27902
15420	15363	84484.3	2929.41	-1.0065	-7.28454
15440	15383	84548.3	2929.51	-1.00726	-7.29006
15460	15403	84612.3	2929.6	-1.00802	-7.29558
15480	15423	84676.2	2929.7	-1.00879	-7.30109
15500	15443	84740	2929.79	-1.00955	-7.3066
15520	15463	84803.9	2929.89	-1.01031	-7.3121
15540	15483	84867.6	2929.98	-1.01107	-7.3176
15560	15503	84931.3	2930.08	-1.01183	-7.32309
15580	15523	84995	2930.17	-1.01258	-7.32858
15600	15543	85058.6	2930.27	-1.01334	-7.33406
15620	15563	85122.1	2930.36	-1.0141	-7.33954
15640	15583	85185.6	2930.46	-1.01485	-7.34501
15660	15603	85249	2930.55	-1.01561	-7.35048
15680	15623	85312.4	2930.65	-1.01637	-7.35595
15700	15643	85375.8	2930.74	-1.01712	-7.36141
15720	15663	85439	2930.83	-1.01787	-7.36687
15740	15683	85502.3	2930.93	-1.01863	-7.37232
15760	15703	85565.4	2931.02	-1.01938	-7.37776
15780	15723	85628.6	2931.12	-1.02013	-7.38321
15800	15743	85691.6	2931.21	-1.02088	-7.38865
15820	15763	85754.7	2931.3	-1.02163	-7.39408
15840	15783	85817.6	2931.4	-1.02238	-7.39951
15860	15803	85880.6	2931.49	-1.02313	-7.40494
15880	15823	85943.4	2931.59	-1.02388	-7.41036
15900	15843	86006.3	2931.68	-1.02463	-7.41577
15920	15863	86069	2931.77	-1.02538	-7.42119
15940	15883	86131.7	2931.87	-1.02613	-7.42659
15960	15903	86194.4	2931.96	-1.02687	-7.432
15980	15923	86257	2932.05	-1.02762	-7.4374
16000	15943	86319.6	2932.15	-1.02836	-7.44279
16020	15963	86382.1	2932.24	-1.02911	-7.44818
16040	15983	86444.6	2932.33	-1.02985	-7.45357
16060	16003	86507	2932.42	-1.0306	-7.45895
16080	16023	86569.3	2932.52	-1.03134	-7.46433
16100	16043	86631.7	2932.61	-1.03208	-7.4697
16120	16063	86693.9	2932.7	-1.03282	-7.47507
16140	16083	86756.1	2932.8	-1.03357	-7.48043
16160	16103	86818.3	2932.89	-1.03431	-7.48579
16180	16123	86880.4	2932.98	-1.03505	-7.49115
16200	16143	86942.5	2933.07	-1.03579	-7.4965
16220	16163	87004.5	2933.17	-1.03652	-7.50185
16240	16183	87066.5	2933.26	-1.03726	-7.50719
16260	16203	87128.4	2933.35	-1.038	-7.51253
16280	16223	87190.2	2933.44	-1.03874	-7.51786
16300	16243	87252	2933.53	-1.03947	-7.52318
16320	16263	87313.6	2933.63	-1.04021	-7.5285
16340	16283	87375.3	2933.72	-1.04094	-7.53381
16360	16303	87436.8	2933.81	-1.04167	-7.53912
16380	16323	87498.3	2933.9	-1.04241	-7.54442
16400	16343	87559.7	2933.99	-1.04314	-7.54972
16420	16363	87621.1	2934.08	-1.04387	-7.55501
16440	16383	87682.3	2934.17	-1.0446	-7.56029
16460	16403	87743.5	2934.27	-1.04533	-7.56557
16480	16423	87804.7	2934.36	-1.04606	-7.57084
16500	16443	87865.7	2934.45	-1.04678	-7.5761
16520	16463	87926.7	2934.54	-1.04751	-7.58136
16540	16483	87987.6	2934.63	-1.04824	-7.58662
16560	16503	88048.5	2934.72	-1.04896	-7.59186
16580	16523	88109.3	2934.81	-1.04969	-7.5971
16600	16543	88170	2934.9	-1.05041	-7.60234
16620	16563	88230.7	2934.99	-1.05113	-7.60757
16640	16583	88291.3	2935.08	-1.05185	-7.6128
16660	16603	88351.8	2935.17	-1.05258	-7.61802
16680	16623	88412.3	2935.26	-1.0533	-7.62323
16700	16643	88472.8	2935.35	-1.05402	-7.62845
16720	16663	88533.2	2935.44	-1.05474	-7.63365
16740	16683	88593.5	2935.53	-1.05545	-7.63885
16760	16703	88653.8	2935.62	-1.05617	-7.64405
16780	16723	88714	2935.71	-1.05689	-7.64924
16800	16743	88774.1	2935.8	-1.05761	-7.65443
16820	16763	88834.2	2935.89	-1.05832	-7.65961
16840	16783	88894.3	2935.98	-1.05904	-7.66479
16860	16803	88954.3	2936.07	-1.05975	-7.66996
16880	16823	89014.2	2936.16	-1.06047	-7.67513
16900	16843	89074.1	2936.25	-1.06118	-7.68029
16920	16863	89133.9	2936.34	-1.06189	-7.68545
16940	16883	89193.7	2936.43	-1.06261	-7.69061
16960	16903	89253.4	2936.51	-1.06332	-7.69575
16980	16923	89313.1	2936.6	-1.06403	-7.7009
17000	16943	89372.7	2936.69	-1.06474	-7.70604
17020	16963	89432.2	2936.78	-1.06545	-7.71117
17040	16983	89491.7	2936.87	-1.06616	-7.7163
17060	17003	89551.1	2936.96	-1.06686	-7.72143
17080	17023	89610.5	2937.05	-1.06757	-7.72655
17100	17043	89669.9	2937.13	-1.06828	-7.73166
17120	17063	89729.1	2937.22	-1.06898	-7.73677
17140	17083	89788.3	2937.31	-1.06969	-7.74188
17160	17103	89847.5	2937.4	-1.07039	-7.74698
17180	17123	89906.6	2937.49	-1.0711	-7.75208
17200	17143	89965.7	2937.58	-1.0718	-7.75717
17220	17163	90024.7	2937.66	-1.0725	-7.76225
17240	17183	90083.6	2937.75	-1.07321	-7.76734
17260	17203	90142.5	2937.84	-1.07391	-7.77241
17280	17223	90201.3	2937.93	-1.07461	-7.77749
17300	17243	90260.1	2938.01	-1.07531	-7.78256
17320	17263	90318.8	2938.1	-1.07601	-7.78762
17340	17283	90377.5	2938.19	-1.07671	-7.79268
17360	17303	90436.1	2938.28	-1.07741	-7.79773
17380	17323	90494.7	2938.36	-1.0781	-7.80278
17400	17343	90553.2	2938.45	-1.0788	-7.80783
17420	17363	90611.6	2938.54	-1.0795	-7.81287
17440	17383	90670	2938.62	-1.08019	-7.8179
17460	17403	90728.4	2938.71	-1.08089	-7.82293
17480	17423	90786.7	2938.8	-1.08158	-7.82796
17500	17443	90844.9	2938.88	-1.08228	-7.83298
17520	17463	90903.1	2938.97	-1.08297	-7.83799
17540	17483	90961.2	2939.06	-1.08366	-7.84301
17560	17503	91019.3	2939.14	-1.08435	-7.84801
17580	17523	91077.3	2939.23	-1.08505	-7.85302
17600	17543	91135.3	2939.32	-1.08574	-7.85801
17620	17563	91193.2	2939.4	-1.08643	-7.86301
17640	17583	91251	2939.49	-1.08712	-7.868
17660	17603	91308.8	2939.58	-1.0878	-7.87298
17680	17623	91366.6	2939.66	-1.08849	-7.87796
17700	17643	91424.3	2939.75	-1.08918	-7.88294
17720	17663	91481.9	2939.83	-1.08987	-7.88791
17740	17683	91539.5	2939.92	-1.09055	-7.89287
17760	17703	91597.1	2940	-1.09124	-7.89783
17780	17723	91654.5	2940.09	-1.09192	-7.90279
17800	17743	91712	2940.18	-1.09261	-7.90774
17820	17763	91769.3	2940.26	-1.09329	-7.91269
17840	17783	91826.7	2940.35	-1.09397	-7.91763
17860	17803	91883.9	2940.43	-1.09466	-7.92257
17880	17823	91941.2	2940.52	-1.09534	-7.9275
17900	17843	91998.3	2940.6	-1.09602	-7.93243
17920	17863	92055.4	2940.69	-1.0967	-7.93736
17940	17883	92112.5	2940.77	-1.09738	-7.94228
17960	17903	92169.5	2940.86	-1.09806	-7.94719
17980	17923	92226.5	2940.94	-1.09874	-7.9521
18000	17943	92283.4	2941.03	-1.09941	-7.95701
18020	17963	92340.2	2941.11	-1.10009	-7.96191
18040	17983	92397	2941.2	-1.10077	-7.96681
18060	18003	92453.7	2941.28	-1.10144	-7.9717
18080	18023	92510.4	2941.36	-1.10212	-7.97659
18100	18043	92567.1	2941.45	-1.10279	-7.98147
18120	18063	92623.7	2941.53	-1.10347	-7.98635
18140	18083	92680.2	2941.62	-1.10414	-7.99122
18160	18103	92736.7	2941.7	-1.10481	-7.99609
18180	18123	92793.1	2941.79	-1.10549	-8.00096
18200	18143	92849.5	2941.87	-1.10616	-8.00582
18220	18163	92905.8	2941.95	-1.10683	-8.01068
18240	18183	92962.1	2942.04	-1.1075	-8.01553
18260	18203	93018.3	2942.12	-1.10817	-8.02038
18280	18223	93074.5	2942.2	-1.10884	-8.02522
18300	18243	93130.6	2942.29	-1.10951	-8.03006
18320	18263	93186.6	2942.37	-1.11018	-8.03489
18340	18283	93242.6	2942.46	-1.11084	-8.03972
18360	18303	93298.6	2942.54	-1.11151	-8.04455
18380	18323	93354.5	2942.62	-1.11218	-8.04937
18400	18343	93410.4	2942.71	-1.11284	-8.05418
18420	18363	93466.2	2942.79	-1.11351	-8.05899
18440	18383	93521.9	2942.87	-1.11417	-8.0638
18460	18403	93577.6	2942.95	-1.11483	-8.0686
18480	18423	93633.3	2943.04	-1.1155	-8.0734
18500	18443	93688.9	2943.12	-1.11616	-8.0782
18520	18463	93744.4	2943.2	-1.11682	-8.08299
18540	18483	93799.9	2943.29	-1.11748	-8.08777
18560	18503	93855.4	2943.37	-1.11814	-8.09255
18580	18523	93910.8	2943.45	-1.1188	-8.09733
18600	18543	93966.1	2943.53	-1.11946	-8.1021
18620	18563	94021.4	2943.61	-1.12012	-8.10687
18640	18583	94076.6	2943.7	-1.12078	-8.11163
18660	18603	94131.8	2943.78	-1.12144	-8.11639
18680	18623	94186.9	2943.86	-1.12209	-8.12114
18700	18643	94242	2943.94	-1.12275	-8.12589
18720	18663	94297.1	2944.03	-1.1234	-8.13064
18740	18683	94352	2944.11	-1.12406	-8.13538
18760	18703	94407	2944.19	-1.12471	-8.14011
18780	18723	94461.8	2944.27	-1.12537	-8.14484
18800	18743	94516.6	2944.35	-1.12602	-8.14957
18820	18763	94571.4	2944.43	-1.12667	-8.15429
18840	18783	94626.1	2944.52	-1.12732	-8.15901
18860	18803	94680.8	2944.6	-1.12798	-8.16372
18880	18823	94735.4	2944.68	-1.12863	-8.16843
18900	18843	94790	2944.76	-1.12928	-8.17314
18920	18863	94844.5	2944.84	-1.12993	-8.17784
18940	18883	94898.9	2944.92	-1.13057	-8.18253
18960	18903	94953.3	2945	-1.13122	-8.18722
18980	18923	95007.7	2945.08	-1.13187	-8.19191
19000	18943	95062	2945.16	-1.13252	-8.19659
19020	18963	95116.2	2945.25	-1.13316	-8.20127
19040	18983	95170.4	2945.33	-1.13381	-8.20594
19060	19003	95224.6	2945.41	-1.13445	-8.21061
19080	19023	95278.7	2945.49	-1.1351	-8.21528
19100	19043	95332.7	2945.57	-1.13574	-8.21994
19120	19063	95386.7	2945.65	-1.13639	-8.22459
19140	19083	95440.7	2945.73	-1.13703	-8.22924
19160	19103	95494.6	2945.81	-1.13767	-8.23389
19180	19123	95548.4	2945.89	-1.13831	-8.23853
19200	19143	95602.2	2945.97	-1.13895	-8.24317
19220	19163	95655.9	2946.05	-1.13959	-8.2478
19240	19183	95709.6	2946.13	-1.14023	-8.25243
19260	19203	95763.2	2946.21	-1.14087	-8.25706
19280	19223	95816.8	2946.29	-1.14151	-8.26168
19300	19243	95870.4	2946.37	-1.14215	-8.26629
19320	19263	95923.9	2946.45	-1.14278	-8.2709
19340	19283	95977.3	2946.53	-1.14342	-8.27551
19360	19303	96030.7	2946.61	-1.14406	-8.28011
19380	19323	96084	2946.69	-1.14469	-8.28471
19400	19343	96137.3	2946.77	-1.14533	-8.28931
19420	19363	96190.5	2946.85	-1.14596	-8.2939
19440	19383	96243.7	2946.92	-1.1466	-8.29848
19460	19403	96296.8	2947	-1.14723	-8.30306
19480	19423	96349.9	2947.08	-1.14786	-8.30764
19500	19443	96402.9	2947.16	-1.14849	-8.31221
19520	19463	96455.9	2947.24	-1.14912	-8.31678
19540	19483	96508.9	2947.32	-1.14975	-8.32135
19560	19503	96561.7	2947.4	-1.15038	-8.3259
19580	19523	96614.6	2947.48	-1.15101	-8.33046
19600	19543	96667.3	2947.56	-1.15164	-8.33501
19620	19563	96720.1	2947.63	-1.15227	-8.33956
19640	19583	96772.7	2947.71	-1.1529	-8.3441
19660	19603	96825.4	2947.79	-1.15353	-8.34864
19680	19623	96878	2947.87	-1.15415	-8.35317
19700	19643	96930.5	2947.95	-1.15478	-8.3577
19720	19663	96983	2948.03	-1.1554	-8.36223
19740	19683	97035.4	2948.1	-1.15603	-8.36675
19760	19703	97087.8	2948.18	-1.15665	-8.37126
19780	19723	97140.1	2948.26	-1.15727	-8.37577
19800	19743	97192.4	2948.34	-1.1579	-8.38028
19820	19763	97244.6	2948.41	-1.15852	-8.38479
19840	19783	97296.8	2948.49	-1.15914	-8.38929
19860	19803	97348.9	2948.57	-1.15976	-8.39378
19880	19823	97401	2948.65	-1.16038	-8.39827
19900	19843	97453.1	2948.73	-1.161	-8.40276
19920	19863	97505	2948.8	-1.16162	-8.40724
19940	19883	97557	2948.88	-1.16224	-8.41172
19960	19903	97608.9	2948.96	-1.16286	-8.41619
19980	19923	97660.7	2949.03	-1.16348	-8.42066
20000	19943	97712.5	2949.11	-1.16409	-8.42513
20020	19963	97764.2	2949.19	-1.16471	-8.42959
20040	19983	97815.9	2949.27	-1.16533	-8.43405
20060	20003	97867.6	2949.34	-1.16594	-8.4385
20080	20023	97919.2	2949.42	-1.16656	-8.44295
20100	20043	97970.7	2949.5	-1.16717	-8.44739
20120	20063	98022.2	2949.57	-1.16778	-8.45183
20140	20083	98073.6	2949.65	-1.1684	-8.45627
20160	20103	98125	2949.73	-1.16901	-8.4607
20180	20123	98176.4	2949.8	-1.16962	-8.46513
20200	20143	98227.7	2949.88	-1.17023	-8.46955
20220	20163	98278.9	2949.96	-1.17084	-8.47397
20240	20183	98330.1	2950.03	-1.17145	-8.47838
20260	20203	98381.3	2950.11	-1.17206	-8.48279
20280	20223	98432.4	2950.18	-1.17267	-8.4872
20300	20243	98483.5	2950.26	-1.17328	-8.4916
20320	20263	98534.5	2950.34	-1.17389	-8.496
20340	20283	98585.4	2950.41	-1.17449	-8.5004
20360	20303	98636.3	2950.49	-1.1751	-8.50479
20380	20323	98687.2	2950.56	-1.17571	-8.50917
20400	20343	98738	2950.64	-1.17631	-8.51355
20420	20363	98788.8	2950.71	-1.17692	-8.51793
20440	20383	98839.5	2950.79	-1.17752	-8.5223
20460	20403	98890.2	2950.87	-1.17812	-8.52667
20480	20423	98940.8	2950.94	-1.17873	-8.53104
20500	20443	98991.4	2951.02	-1.17933	-8.5354
20520	20463	99041.9	2951.09	-1.17993	-8.53975
20540	20483	99092.4	2951.17	-1.18053	-8.54411
20560	20503	99142.8	2951.24	-1.18113	-8.54846
20580	20523	99193.2	2951.32	-1.18173	-8.5528
20600	20543	99243.5	2951.39	-1.18233	-8.55714
20620	20563	99293.8	2951.47	-1.18293	-8.56148
20640	20583	99344.1	2951.54	-1.18353	-8.56581
20660	20603	99394.3	2951.62	-1.18413	-8.57014
20680	20623	99444.4	2951.69	-1.18473	-8.57446
20700	20643	99494.5	2951.77	-1.18532	-8.57878
20720	20663	99544.6	2951.84	-1.18592	-8.5831
20740	20683	99594.6	2951.91	-1.18652	-8.58741
20760	20703	99644.5	2951.99	-1.18711	-8.59171
20780	20723	99692.6	2952.06	-1.18768	-8.59586
20800	20743	99743.3	2952.14	-1.18829	-8.60023
20820	20763	99793.9	2952.21	-1.18889	-8.60459
20840	20783	99844.5	2952.29	-1.18949	-8.60896
20860	20803	99895.1	2952.36	-1.1901	-8.61332
20880	20823	99945.7	2952.44	-1.1907	-8.61768
20900	20843	99996.2	2952.51	-1.1913	-8.62204
20920	20863	100047	2952.59	-1.1919	-8.62639
20940	20883	100097	2952.66	-1.1925	-8.63075
20960	20903	100148	2952.74	-1.1931	-8.6351
20980	20923	100198	2952.81	-1.19371	-8.63944
21000	20943	100248	2952.89	-1.19431	-8.64379
21020	20963	100299	2952.96	-1.19491	-8.64813
21040	20983	100349	2953.04	-1.19551	-8.65247
21060	21003	100399	2953.11	-1.1961	-8.65681
21080	21023	100450	2953.19	-1.1967	-8.66114
21100	21043	100500	2953.26	-1.1973	-8.66548
21120	21063	100550	2953.34	-1.1979	-8.66981
21140	21083	100600	2953.41	-1.1985	-8.67414
21160	21103	100651	2953.49	-1.1991	-8.67846
21180	21123	100701	2953.56	-1.19969	-8.68278
21200	21143	100751	2953.64	-1.20029	-8.6871
21220	21163	100801	2953.71	-1.20089	-8.69142
21240	21183	100851	2953.79	-1.20148	-8.69574
21260	21203	100901	2953.86	-1.20208	-8.70005
21280	21223	100951	2953.93	-1.20268	-8.70436
21300	21243	101001	2954.01	-1.20327	-8.70867
21320	21263	101051	2954.08	-1.20387	-8.71298
21340	21283	101101	2954.16	-1.20446	-8.71728
21360	21303	101151	2954.23	-1.20505	-8.72158
21380	21323	101201	2954.31	-1.20565	-8.72588
21400	21343	101250	2954.38	-1.20624	-8.73018
21420	21363	101300	2954.45	-1.20684	-8.73447
21440	21383	101350	2954.53	-1.20743	-8.73876
21460	21403	101400	2954.6	-1.20802	-8.74305
21480	21423	101449	2954.68	-1.20861	-8.74734
21500	21443	101499	2954.75	-1.20921	-8.75162
21520	21463	101549	2954.82	-1.2098	-8.7559
21540	21483	101598	2954.9	-1.21039	-8.76018
21560	21503	101648	2954.97	-1.21098	-8.76446
21580	21523	101698	2955.05	-1.21157	-8.76874
21600	21543	101747	2955.12	-1.21216	-8.77301
21620	21563	101797	2955.19	-1.21275	-8.77728
21640	21583	101846	2955.27	-1.21334	-8.78155
21660	21603	101896	2955.34	-1.21393	-8.78581
21680	21623	101945	2955.41	-1.21452	-8.79007
21700	21643	101994	2955.49	-1.21511	-8.79433
21720	21663	102044	2955.56	-1.21569	-8.79859
21740	21683	102093	2955.64	-1.21628	-8.80285
21760	21703	102143	2955.71	-1.21687	-8.8071
21780	21723	102192	2955.78	-1.21746	-8.81135
21800	21743	102241	2955.86	-1.21804	-8.8156
21820	21763	102290	2955.93	-1.21863	-8.81984
21840	21783	102340	2956	-1.21922	-8.82409
21860	21803	102389	2956.08	-1.2198	-8.82833
21880	21823	102438	2956.15	-1.22039	-8.83257
21900	21843	102487	2956.22	-1.22097	-8.8368
21920	21863	102536	2956.29	-1.22156	-8.84104
21940	21883	102585	2956.37	-1.22214	-8.84527
21960	21903	102634	2956.44	-1.22273	-8.8495
21980	21923	102683	2956.51	-1.22331	-8.85372
22000	21943	102732	2956.59	-1.2239	-8.85795
22020	21963	102781	2956.66	-1.22448	-8.86217
22040	21983	102830	2956.73	-1.22506	-8.86639
22060	22003	102879	2956.81	-1.22565	-8.87061
22080	22023	102928	2956.88	-1.22623	-8.87482
22100	22043	102977	2956.95	-1.22681	-8.87904
22120	22063	103026	2957.02	-1.22739	-8.88325
22140	22083	103074	2957.1	-1.22797	-8.88745
22160	22103	103123	2957.17	-1.22855	-8.89166
22180	22123	103172	2957.24	-1.22913	-8.89586
22200	22143	103221	2957.31	-1.22971	-8.90006
22220	22163	103269	2957.39	-1.2303	-8.90426
22240	22183	103318	2957.46	-1.23087	-8.90846
22260	22203	103367	2957.53	-1.23145	-8.91265
22280	22223	103415	2957.6	-1.23203	-8.91684
22300	22243	103464	2957.68	-1.23261	-8.92103
22320	22263	103512	2957.75	-1.23319	-8.92522
22340	22283	103561	2957.82	-1.23377	-8.9294
22360	22303	103609	2957.89	-1.23435	-8.93358
22380	22323	103658	2957.97	-1.23492	-8.93776
22400	22343	103706	2958.04	-1.2355	-8.94194
22420	22363	103755	2958.11	-1.23608	-8.94611
22440	22383	103803	2958.18	-1.23665	-8.95029
22460	22403	103851	2958.25	-1.23723	-8.95446
22480	22423	103900	2958.33	-1.23781	-8.95862
22500	22443	103948	2958.4	-1.23838	-8.96279
22520	22463	103996	2958.47	-1.23896	-8.96695
22540	22483	104045	2958.54	-1.23953	-8.97111
22560	22503	104093	2958.61	-1.24011	-8.97527
22580	22523	104141	2958.69	-1.24068	-8.97943
22600	22543	104189	2958.76	-1.24125	-8.98358
22620	22563	104237	2958.83	-1.24183	-8.98773
22640	22583	104286	2958.9	-1.2424	-8.99188
22660	22603	104334	2958.97	-1.24297	-8.99603
22680	22623	104382	2959.04	-1.24355	-9.00017
22700	22643	104430	2959.11	-1.24412	-9.00431
22720	22663	104478	2959.19	-1.24469	-9.00845
22740	22683	104526	2959.26	-1.24526	-9.01259
22760	22703	104574	2959.33	-1.24583	-9.01672
22780	22723	104622	2959.4	-1.2464	-9.02086
22800	22743	104669	2959.47	-1.24698	-9.02499
22820	22763	104717	2959.54	-1.24755	-9.02911
22840	22783	104765	2959.61	-1.24812	-9.03324
22860	22803	104813	2959.69	-1.24869	-9.03736
22880	22823	104861	2959.76	-1.24926	-9.04148
22900	22843	104909	2959.83	-1.24982	-9.0456
22920	22863	104956	2959.9	-1.25039	-9.04972
22940	22883	105004	2959.97	-1.25096	-9.05383
22960	22903	105052	2960.04	-1.25153	-9.05794
22980	22923	105099	2960.11	-1.2521	-9.06205
23000	22943	105147	2960.18	-1.25266	-9.06616
23020	22963	105195	2960.25	-1.25323	-9.07026
23040	22983	105242	2960.32	-1.2538	-9.07437
23060	23003	105290	2960.4	-1.25437	-9.07847
23080	23023	105337	2960.47	-1.25493	-9.08257
23100	23043	105385	2960.54	-1.2555	-9.08666
23120	23063	105432	2960.61	-1.25606	-9.09075
23140	23083	105480	2960.68	-1.25663	-9.09484
23160	23103	105527	2960.75	-1.25719	-9.09893
23180	23123	105575	2960.82	-1.25776	-9.10302
23200	23143	105622	2960.89	-1.25832	-9.1071
23220	23163	105669	2960.96	-1.25889	-9.11118
23240	23183	105717	2961.03	-1.25945	-9.11526
23260	23203	105764	2961.1	-1.26001	-9.11934
23280	23223	105811	2961.17	-1.26058	-9.12342
23300	23243	105858	2961.24	-1.26114	-9.12749
23320	23263	105905	2961.31	-1.2617	-9.13156
23340	23283	105953	2961.38	-1.26226	-9.13563
23360	23303	106000	2961.45	-1.26282	-9.13969
23380	23323	106047	2961.52	-1.26339	-9.14375
23400	23343	106094	2961.59	-1.26395	-9.14782
23420	23363	106141	2961.66	-1.26451	-9.15187
23440	23383	106188	2961.73	-1.26507	-9.15593
23460	23403	106235	2961.8	-1.26563	-9.15999
23480	23423	106282	2961.87	-1.26619	-9.16404
23500	23443	106329	2961.94	-1.26675	-9.16809
23520	23463	106376	2962.01	-1.26731	-9.17213
23540	23483	106423	2962.08	-1.26787	-9.17618
23560	23503	106470	2962.15	-1.26842	-9.18022
23580	23523	106517	2962.22	-1.26898	-9.18426
23600	23543	106564	2962.29	-1.26954	-9.1883
23620	23563	106610	2962.36	-1.2701	-9.19234
23640	23583	106657	2962.43	-1.27066	-9.19637
23660	23603	106704	2962.5	-1.27121	-9.2004
23680	23623	106751	2962.57	-1.27177	-9.20443
23700	23643	106797	2962.64	-1.27233	-9.20846
23720	23663	106844	2962.71	-1.27288	-9.21248
23740	23683	106891	2962.78	-1.27344	-9.2165
23760	23703	106937	2962.85	-1.27399	-9.22052
23780	23723	106984	2962.92	-1.27455	-9.22454
23800	23743	107030	2962.99	-1.2751	-9.22856
23820	23763	107077	2963.06	-1.27566	-9.23257
23840	23783	107124	2963.13	-1.27621	-9.23658
23860	23803	107170	2963.2	-1.27677	-9.24059
23880	23823	107216	2963.26	-1.27732	-9.2446
23900	23843	107263	2963.33	-1.27787	-9.2486
23920	23863	107309	2963.4	-1.27843	-9.2526
23940	23883	107356	2963.47	-1.27898	-9.2566
23960	23903	107402	2963.54	-1.27953	-9.2606
23980	23923	107448	2963.61	-1.28008	-9.26459
24000	23943	107495	2963.68	-1.28063	-9.26859
24020	23963	107541	2963.75	-1.28119	-9.27258
24040	23983	107587	2963.82	-1.28174	-9.27657
24060	24003	107633	2963.89	-1.28229	-9.28055
24080	24023	107680	2963.95	-1.28284	-9.28454
24100	24043	107726	2964.02	-1.28339	-9.28852
24120	24063	107772	2964.09	-1.28394	-9.2925
24140	24083	107818	2964.16	-1.28449	-9.29647
24160	24103	107864	2964.23	-1.28504	-9.30045
24180	24123	107910	2964.3	-1.28559	-9.30442
24200	24143	107956	2964.37	-1.28613	-9.30839
24220	24163	108002	2964.44	-1.28668	-9.31236
24240	24183	108048	2964.5	-1.28723	-9.31633
24260	24203	108094	2964.57	-1.28778	-9.32029
24280	24223	108140	2964.64	-1.28832	-9.32425
24300	24243	108186	2964.71	-1.28887	-9.32821
24320	24263	108232	2964.78	-1.28942	-9.33217
24340	24283	108278	2964.85	-1.28997	-9.33612
24360	24303	108324	2964.91	-1.29051	-9.34008
24380	24323	108370	2964.98	-1.29106	-9.34403
24400	24343	108415	2965.05	-1.2916	-9.34797
24420	24363	108461	2965.12	-1.29215	-9.35192
24440	24383	108507	2965.19	-1.29269	-9.35586
24460	24403	108553	2965.25	-1.29324	-9.35981
24480	24423	108598	2965.32	-1.29378	-9.36374
24500	24443	108644	2965.39	-1.29433	-9.36768
24520	24463	108690	2965.46	-1.29487	-9.37162
24540	24483	108735	2965.53	-1.29541	-9.37555
24560	24503	108781	2965.59	-1.29596	-9.37948
24580	24523	108826	2965.66	-1.2965	-9.38341
24600	24543	108872	2965.73	-1.29704	-9.38733
24620	24563	108917	2965.8	-1.29758	-9.39126
24640	24583	108963	2965.87	-1.29812	-9.39518
24660	24603	109008	2965.93	-1.29867	-9.3991
24680	24623	109054	2966	-1.29921	-9.40302
24700	24643	109099	2966.07	-1.29975	-9.40693
24720	24663	109145	2966.14	-1.30029	-9.41084
24740	24683	109190	2966.2	-1.30083	-9.41475
24760	24703	109235	2966.27	-1.30137	-9.41866
24780	24723	109281	2966.34	-1.30191	-9.42257
24800	24743	109326	2966.41	-1.30245	-9.42647
24820	24763	109371	2966.47	-1.30299	-9.43037
24840	24783	109416	2966.54	-1.30353	-9.43427
24860	24803	109462	2966.61	-1.30406	-9.43817
24880	24823	109507	2966.68	-1.3046	-9.44207
24900	24843	109552	2966.74	-1.30514	-9.44596
24920	24863	109597	2966.81	-1.30568	-9.44985
24940	24883	109642	2966.88	-1.30622	-9.45374
24960	24903	109687	2966.94	-1.30675	-9.45762
24980	24923	109732	2967.01	-1.30729	-9.46151
25000	24943	109777	2967.08	-1.30783	-9.46539
25020	24963	109822	2967.15	-1.30836	-9.46927
25040	24983	109867	2967.21	-1.3089	-9.47315
25060	25003	109912	2967.28	-1.30943	-9.47702
25080	25023	109957	2967.35	-1.30997	-9.4809
25100	25043	110002	2967.41	-1.3105	-9.48477
25120	25063	110047	2967.48	-1.31104	-9.48864
25140	25083	110092	2967.55	-1.31157	-9.4925
25160	25103	110136	2967.61	-1.31211	-9.49637
25180	25123	110181	2967.68	-1.31264	-9.50023
25200	25143	110226	2967.75	-1.31317	-9.50409
25220	25163	110271	2967.81	-1.31371	-9.50795
25240	25183	110315	2967.88	-1.31424	-9.5118
25260	25203	110360	2967.95	-1.31477	-9.51566
25280	25223	110405	2968.01	-1.3153	-9.51951
25300	25243	110449	2968.08	-1.31584	-9.52336
25320	25263	110494	2968.15	-1.31637	-9.5272
25340	25283	110539	2968.21	-1.3169	-9.53105
25360	25303	110583	2968.28	-1.31743	-9.53489
25380	25323	110628	2968.34	-1.31796	-9.53873
25400	25343	110672	2968.41	-1.31849	-9.54257
25420	25363	110717	2968.48	-1.31902	-9.54641
25440	25383	110761	2968.54	-1.31955	-9.55024
25460	25403	110806	2968.61	-1.32008	-9.55407
25480	25423	110850	2968.68	-1.32061	-9.5579
25500	25443	110895	2968.74	-1.32114	-9.56173
25520	25463	110939	2968.81	-1.32167	-9.56556
25540	25483	110983	2968.87	-1.32219	-9.56938
25560	25503	111028	2968.94	-1.32272	-9.5732
25580	25523	111072	2969.01	-1.32325	-9.57702
25600	25543	111116	2969.07	-1.32378	-9.58084
25620	25563	111160	2969.14	-1.3243	-9.58465
25640	25583	111205	2969.2	-1.32483	-9.58846
25660	25603	111249	2969.27	-1.32536	-9.59228
25680	25623	111293	2969.34	-1.32588	-9.59608
25700	25643	111337	2969.4	-1.32641	-9.59989
25720	25663	111381	2969.47	-1.32694	-9.60369
25740	25683	111425	2969.53	-1.32746	-9.6075
25760	25703	111469	2969.6	-1.32799	-9.6113
25780	25723	111513	2969.66	-1.32851	-9.61509
25800	25743	111557	2969.73	-1.32903	-9.61889
25820	25763	111601	2969.79	-1.32956	-9.62268
25840	25783	111645	2969.86	-1.33008	-9.62647
25860	25803	111689	2969.93	-1.33061	-9.63026
25880	25823	111733	2969.99	-1.33113	-9.63405
25900	25843	111777	2970.06	-1.33165	-9.63783
25920	25863	111821	2970.12	-1.33217	-9.64162
25940	25883	111865	2970.19	-1.3327	-9.6454
25960	25903	111909	2970.25	-1.33322	-9.64917
25980	25923	111952	2970.32	-1.33374	-9.65295
26000	25943	111996	2970.38	-1.33426	-9.65673
26020	25963	112040	2970.45	-1.33478	-9.6605
26040	25983	112084	2970.51	-1.3353	-9.66427
26060	26003	112127	2970.58	-1.33583	-9.66803
26080	26023	112171	2970.64	-1.33635	-9.6718
26100	26043	112215	2970.71	-1.33687	-9.67556
26120	26063	112258	2970.77	-1.33739	-9.67933
26140	26083	112302	2970.84	-1.3379	-9.68308
26160	26103	112346	2970.9	-1.33842	-9.68684
26180	26123	112389	2970.97	-1.33894	-9.6906
26200	26143	112433	2971.03	-1.33946	-9.69435
26220	26163	112476	2971.1	-1.33998	-9.6981
26240	26183	112520	2971.16	-1.3405	-9.70185
26260	26203	112563	2971.23	-1.34101	-9.7056
26280	26223	112606	2971.29	-1.34153	-9.70934
26300	26243	112650	2971.36	-1.34205	-9.71308
26320	26263	112693	2971.42	-1.34257	-9.71682
26340	26283	112737	2971.49	-1.34308	-9.72056
26360	26303	112780	2971.55	-1.3436	-9.7243
26380	26323	112823	2971.61	-1.34411	-9.72803
26400	26343	112867	2971.68	-1.34463	-9.73176
26420	26363	112910	2971.74	-1.34515	-9.73549
26440	26383	112953	2971.81	-1.34566	-9.73922
26460	26403	112996	2971.87	-1.34618	-9.74295
26480	26423	113039	2971.94	-1.34669	-9.74667
26500	26443	113083	2972	-1.3472	-9.75039
26520	26463	113126	2972.06	-1.34772	-9.75411
26540	26483	113169	2972.13	-1.34823	-9.75783
26560	26503	113212	2972.19	-1.34874	-9.76154
26580	26523	113255	2972.26	-1.34926	-9.76525
26600	26543	113298	2972.32	-1.34977	-9.76897
26620	26563	113341	2972.39	-1.35028	-9.77267
26640	26583	113384	2972.45	-1.3508	-9.77638
26660	26603	113427	2972.51	-1.35131	-9.78009
26680	26623	113470	2972.58	-1.35182	-9.78379
26700	26643	113513	2972.64	-1.35233	-9.78749
26720	26663	113556	2972.71	-1.35284	-9.79119
26740	26683	113599	2972.77	-1.35335	-9.79488
26760	26703	113641	2972.83	-1.35386	-9.79858
26780	26723	113684	2972.9	-1.35437	-9.80227
26800	26743	113727	2972.96	-1.35488	-9.80596
26820	26763	113770	2973.02	-1.35539	-9.80965
26840	26783	113813	2973.09	-1.3559	-9.81333
26860	26803	113855	2973.15	-1.35641	-9.81702
26880	26823	113898	2973.21	-1.35692	-9.8207
26900	26843	113941	2973.28	-1.35743	-9.82438
26920	26863	113983	2973.34	-1.35794	-9.82806
26940	26883	114026	2973.41	-1.35844	-9.83173
26960	26903	114069	2973.47	-1.35895	-9.8354
26980	26923	114111	2973.53	-1.35946	-9.83908
27000	26943	114154	2973.6	-1.35996	-9.84274
27020	26963	114196	2973.66	-1.36047	-9.84641
27040	26983	114239	2973.72	-1.36098	-9.85008
27060	27003	114281	2973.79	-1.36148	-9.85374
27080	27023	114324	2973.85	-1.36199	-9.8574
27100	27043	114366	2973.91	-1.3625	-9.86106
27120	27063	114408	2973.98	-1.363	-9.86472
27140	27083	114451	2974.04	-1.36351	-9.86837
27160	27103	114493	2974.1	-1.36401	-9.87202
27180	27123	114536	2974.16	-1.36451	-9.87568
27200	27143	114578	2974.23	-1.36502	-9.87932
27220	27163	114620	2974.29	-1.36552	-9.88297
27240	27183	114662	2974.35	-1.36603	-9.88662
27260	27203	114705	2974.42	-1.36653	-9.89026
27280	27223	114747	2974.48	-1.36703	-9.8939
27300	27243	114789	2974.54	-1.36754	-9.89754
27320	27263	114831	2974.6	-1.36804	-9.90117
27340	27283	114873	2974.67	-1.36854	-9.90481
27360	27303	114916	2974.73	-1.36904	-9.90844
27380	27323	114958	2974.79	-1.36954	-9.91207
27400	27343	115000	2974.86	-1.37004	-9.9157
27420	27363	115042	2974.92	-1.37055	-9.91932
27440	27383	115084	2974.98	-1.37105	-9.92295
27460	27403	115126	2975.04	-1.37155	-9.92657
27480	27423	115168	2975.11	-1.37205	-9.93019
27500	27443	115210	2975.17	-1.37255	-9.93381
27520	27463	115252	2975.23	-1.37305	-9.93742
27540	27483	115294	2975.29	-1.37355	-9.94104
27560	27503	115336	2975.36	-1.37404	-9.94465
27580	27523	115377	2975.42	-1.37454	-9.94826
27600	27543	115419	2975.48	-1.37504	-9.95187
27620	27563	115461	2975.54	-1.37554	-9.95547
27640	27583	115503	2975.6	-1.37604	-9.95908
27660	27603	115545	2975.67	-1.37654	-9.96268
27680	27623	115586	2975.73	-1.37703	-9.96628
27700	27643	115628	2975.79	-1.37753	-9.96988
27720	27663	115670	2975.85	-1.37803	-9.97347
27740	27683	115711	2975.92	-1.37852	-9.97706
27760	27703	115753	2975.98	-1.37902	-9.98066
27780	27723	115795	2976.04	-1.37952	-9.98425
27800	27743	115836	2976.1	-1.38001	-9.98783
27820	27763	115878	2976.16	-1.38051	-9.99142
27840	27783	115919	2976.23	-1.381	-9.995
27860	27803	115961	2976.29	-1.3815	-9.99858
27880	27823	116003	2976.35	-1.38199	-10.0022
27900	27843	116044	2976.41	-1.38249	-10.0057
27920	27863	116085	2976.47	-1.38298	-10.0093
27940	27883	116127	2976.53	-1.38347	-10.0129
27960	27903	116168	2976.6	-1.38397	-10.0165
27980	27923	116210	2976.66	-1.38446	-10.02
28000	27943	116251	2976.72	-1.38495	-10.0236
28020	27963	116292	2976.78	-1.38545	-10.0272
28040	27983	116334	2976.84	-1.38594	-10.0307
28060	28003	116375	2976.9	-1.38643	-10.0343
28080	28023	116416	2976.97	-1.38692	-10.0378
28100	28043	116458	2977.03	-1.38741	-10.0414
28120	28063	116499	2977.09	-1.3879	-10.045
28140	28083	116540	2977.15	-1.3884	-10.0485
28160	28103	116581	2977.21	-1.38889	-10.0521
28180	28123	116622	2977.27	-1.38938	-10.0556
28200	28143	116664	2977.33	-1.38987	-10.0592
28220	28163	116705	2977.39	-1.39036	-10.0627
28240	28183	116746	2977.46	-1.39085	-10.0662
28260	28203	116787	2977.52	-1.39134	-10.0698
28280	28223	116828	2977.58	-1.39182	-10.0733
28300	28243	116869	2977.64	-1.39231	-10.0769
28320	28263	116910	2977.7	-1.3928	-10.0804
28340	28283	116951	2977.76	-1.39329	-10.0839
28360	28303	116992	2977.82	-1.39378	-10.0875
28380	28323	117033	2977.88	-1.39427	-10.091
28400	28343	117074	2977.94	-1.39475	-10.0945
28420	28363	117115	2978	-1.39524	-10.098
28440	28383	117155	2978.07	-1.39573	-10.1016
28460	28403	117196	2978.13	-1.39621	-10.1051
28480	28423	117237	2978.19	-1.3967	-10.1086
28500	28443	117278	2978.25	-1.39719	-10.1121
28520	28463	117319	2978.31	-1.39767	-10.1156
28540	28483	117359	2978.37	-1.39816	-10.1192
28560	28503	117400	2978.43	-1.39864	-10.1227
28580	28523	117441	2978.49	-1.39913	-10.1262
28600	28543	117482	2978.55	-1.39961	-10.1297
28620	28563	117522	2978.61	-1.4001	-10.1332
28640	28583	117563	2978.67	-1.40058	-10.1367
28660	28603	117603	2978.73	-1.40106	-10.1402
28680	28623	117644	2978.79	-1.40155	-10.1437
28700	28643	117685	2978.85	-1.40203	-10.1472
28720	28663	117725	2978.91	-1.40251	-10.1507
28740	28683	117766	2978.97	-1.403	-10.1542
28760	28703	117806	2979.03	-1.40348	-10.1577
28780	28723	117847	2979.1	-1.40396	-10.1612
28800	28743	117887	2979.16	-1.40444	-10.1647
28820	28763	117928	2979.22	-1.40492	-10.1681
28840	28783	117968	2979.28	-1.40541	-10.1716
28860	28803	118008	2979.34	-1.40589	-10.1751
28880	28823	118049	2979.4	-1.40637	-10.1786
28900	28843	118089	2979.46	-1.40685	-10.1821
28920	28863	118129	2979.52	-1.40733	-10.1855
28940	28883	118170	2979.58	-1.40781	-10.189
28960	28903	118210	2979.64	-1.40829	-10.1925
28980	28923	118250	2979.7	-1.40877	-10.196
29000	28943	118290	2979.76	-1.40925	-10.1994
29020	28963	118331	2979.82	-1.40973	-10.2029
29040	28983	118371	2979.88	-1.4102	-10.2064
29060	29003	118411	2979.94	-1.41068	-10.2098
29080	29023	118451	2980	-1.41116	-10.2133
29100	29043	118491	2980.05	-1.41164	-10.2167
29120	29063	118531	2980.11	-1.41212	-10.2202
29140	29083	118571	2980.17	-1.41259	-10.2236
29160	29103	118611	2980.23	-1.41307	-10.2271
29180	29123	118651	2980.29	-1.41355	-10.2306
29200	29143	118691	2980.35	-1.41402	-10.234
29220	29163	118731	2980.41	-1.4145	-10.2374
29240	29183	118771	2980.47	-1.41498	-10.2409
29260	29203	118811	2980.53	-1.41545	-10.2443
29280	29223	118851	2980.59	-1.41593	-10.2478
29300	29243	118891	2980.65	-1.4164	-10.2512
29320	29263	118931	2980.71	-1.41688	-10.2547
29340	29283	118971	2980.77	-1.41735	-10.2581
29360	29303	119010	2980.83	-1.41783	-10.2615
29380	29323	119050	2980.89	-1.4183	-10.265
29400	29343	119090	2980.95	-1.41877	-10.2684
29420	29363	119130	2981.01	-1.41925	-10.2718
29440	29383	119170	2981.07	-1.41972	-10.2752
29460	29403	119209	2981.12	-1.42019	-10.2787
29480	29423	119249	2981.18	-1.42067	-10.2821
29500	29443	119289	2981.24	-1.42114	-10.2855
29520	29463	119328	2981.3	-1.42161	-10.2889
29540	29483	119368	2981.36	-1.42208	-10.2923
29560	29503	119407	2981.42	-1.42256	-10.2957
29580	29523	119447	2981.48	-1.42303	-10.2992
29600	29543	119487	2981.54	-1.4235	-10.3026
29620	29563	119526	2981.6	-1.42397	-10.306
29640	29583	119566	2981.65	-1.42444	-10.3094
29660	29603	119605	2981.71	-1.42491	-10.3128
29680	29623	119645	2981.77	-1.42538	-10.3162
29700	29643	119684	2981.83	-1.42585	-10.3196
29720	29663	119723	2981.89	-1.42632	-10.323
29740	29683	119763	2981.95	-1.42679	-10.3264
29760	29703	119802	2982.01	-1.42726	-10.3298
29780	29723	119842	2982.07	-1.42773	-10.3332
29800	29743	119881	2982.12	-1.4282	-10.3366
29820	29763	119920	2982.18	-1.42866	-10.34
29840	29783	119959	2982.24	-1.42913	-10.3433
29860	29803	119999	2982.3	-1.4296	-10.3467
29880	29823	120038	2982.36	-1.43007	-10.3501
29900	29843	120077	2982.42	-1.43053	-10.3535
29920	29863	120116	2982.48	-1.431	-10.3569
29940	29883	120155	2982.53	-1.43147	-10.3602
29960	29903	120195	2982.59	-1.43193	-10.3636
29980	29923	120234	2982.65	-1.4324	-10.367
30000	29943	120273	2982.71	-1.43287	-10.3704
30020	29963	120312	2982.77	-1.43333	-10.3737
30040	29983	120351	2982.82	-1.4338	-10.3771
30060	30003	120390	2982.88	-1.43426	-10.3805
30080	30023	120429	2982.94	-1.43473	-10.3838
30100	30043	120468	2983	-1.43519	-10.3872
30120	30063	120507	2983.06	-1.43566	-10.3906
30140	30083	120546	2983.11	-1.43612	-10.3939
30160	30103	120585	2983.17	-1.43658	-10.3973
30180	30123	120624	2983.23	-1.43705	-10.4006
30200	30143	120663	2983.29	-1.43751	-10.404
30220	30163	120702	2983.35	-1.43797	-10.4073
30240	30183	120740	2983.4	-1.43844	-10.4107
30260	30203	120779	2983.46	-1.4389	-10.414
30280	30223	120818	2983.52	-1.43936	-10.4174
30300	30243	120857	2983.58	-1.43982	-10.4207
30320	30263	120896	2983.64	-1.44028	-10.4241
30340	30283	120934	2983.69	-1.44075	-10.4274
30360	30303	120973	2983.75	-1.44121	-10.4307
30380	30323	121012	2983.81	-1.44167	-10.4341
30400	30343	121050	2983.87	-1.44213	-10.4374
30420	30363	121089	2983.92	-1.44259	-10.4407
30440	30383	121128	2983.98	-1.44305	-10.4441
30460	30403	121166	2984.04	-1.44351	-10.4474
30480	30423	121205	2984.1	-1.44397	-10.4507
30500	30443	121243	2984.15	-1.44443	-10.454
30520	30463	121282	2984.21	-1.44489	-10.4574
30540	30483	121320	2984.27	-1.44535	-10.4607
30560	30503	121359	2984.33	-1.4458	-10.464
30580	30523	121397	2984.38	-1.44626	-10.4673
30600	30543	121436	2984.44	-1.44672	-10.4706
30620	30563	121474	2984.5	-1.44718	-10.474
30640	30583	121513	2984.55	-1.44764	-10.4773
30660	30603	121551	2984.61	-1.44809	-10.4806
30680	30623	121589	2984.67	-1.44855	-10.4839
30700	30643	121628	2984.73	-1.44901	-10.4872
30720	30663	121666	2984.78	-1.44946	-10.4905
30740	30683	121704	2984.84	-1.44992	-10.4938
30760	30703	121743	2984.9	-1.45038	-10.4971
30780	30723	121781	2984.95	-1.45083	-10.5004
30800	30743	121819	2985.01	-1.45129	-10.5037
30820	30763	121857	2985.07	-1.45174	-10.507
30840	30783	121896	2985.12	-1.4522	-10.5103
30860	30803	121934	2985.18	-1.45265	-10.5136
30880	30823	121972	2985.24	-1.45311	-10.5169
30900	30843	122010	2985.3	-1.45356	-10.5202
30920	30863	122048	2985.35	-1.45402	-10.5234
30940	30883	122086	2985.41	-1.45447	-10.5267
30960	30903	122124	2985.47	-1.45492	-10.53
30980	30923	122162	2985.52	-1.45538	-10.5333
31000	30943	122200	2985.58	-1.45583	-10.5366
31020	30963	122238	2985.64	-1.45628	-10.5398
31040	30983	122276	2985.69	-1.45673	-10.5431
31060	31003	122314	2985.75	-1.45719	-10.5464
31080	31023	122352	2985.8	-1.45764	-10.5497
31100	31043	122390	2985.86	-1.45809	-10.5529
31120	31063	122428	2985.92	-1.45854	-10.5562
31140	31083	122466	2985.97	-1.45899	-10.5595
31160	31103	122504	2986.03	-1.45944	-10.5627
31180	31123	122542	2986.09	-1.45989	-10.566
31200	31143	122579	2986.14	-1.46034	-10.5692
31220	31163	122617	2986.2	-1.46079	-10.5725
31240	31183	122655	2986.26	-1.46124	-10.5758
31260	31203	122693	2986.31	-1.46169	-10.579
31280	31223	122730	2986.37	-1.46214	-10.5823
31300	31243	122768	2986.42	-1.46259	-10.5855
31320	31263	122806	2986.48	-1.46304	-10.5888
31340	31283	122843	2986.54	-1.46349	-10.592
31360	31303	122881	2986.59	-1.46394	-10.5953
31380	31323	122919	2986.65	-1.46439	-10.5985
31400	31343	122956	2986.7	-1.46483	-10.6017
31420	31363	122994	2986.76	-1.46528	-10.605
31440	31383	123031	2986.82	-1.46573	-10.6082
31460	31403	123069	2986.87	-1.46618	-10.6115
31480	31423	123106	2986.93	-1.46662	-10.6147
31500	31443	123144	2986.98	-1.46707	-10.6179
31520	31463	123181	2987.04	-1.46752	-10.6211
31540	31483	123219	2987.1	-1.46796	-10.6244
31560	31503	123256	2987.15	-1.46841	-10.6276
31580	31523	123294	2987.21	-1.46885	-10.6308
31600	31543	123331	2987.26	-1.4693	-10.6341
31620	31563	123368	2987.32	-1.46974	-10.6373
31640	31583	123406	2987.37	-1.47019	-10.6405
31660	31603	123443	2987.43	-1.47063	-10.6437
31680	31623	123480	2987.48	-1.47108	-10.6469
31700	31643	123518	2987.54	-1.47152	-10.6501
31720	31663	123555	2987.6	-1.47197	-10.6534
31740	31683	123592	2987.65	-1.47241	-10.6566
31760	31703	123629	2987.71	-1.47285	-10.6598
31780	31723	123667	2987.76	-1.4733	-10.663
31800	31743	123704	2987.82	-1.47374	-10.6662
31820	31763	123741	2987.87	-1.47418	-10.6694
31840	31783	123778	2987.93	-1.47462	-10.6726
31860	31803	123815	2987.98	-1.47507	-10.6758
31880	31823	123852	2988.04	-1.47551	-10.679
31900	31843	123889	2988.09	-1.47595	-10.6822
31920	31863	123926	2988.15	-1.47639	-10.6854
31940	31883	123963	2988.2	-1.47683	-10.6886
31960	31903	124000	2988.26	-1.47727	-10.6918
31980	31923	124037	2988.31	-1.47771	-10.6949
32000	31943	124074	2988.37	-1.47815	-10.6981
32020	31963	124111	2988.42	-1.47859	-10.7013
32040	31983	124148	2988.48	-1.47903	-10.7045
32060	32003	124185	2988.53	-1.47947	-10.7077
32080	32023	124222	2988.59	-1.47991	-10.7109
32100	32043	124259	2988.64	-1.48035	-10.714
32120	32063	124296	2988.7	-1.48079	-10.7172
32140	32083	124332	2988.75	-1.48123	-10.7204
32160	32103	124369	2988.81	-1.48167	-10.7236
32180	32123	124406	2988.86	-1.48211	-10.7267
32200	32143	124443	2988.92	-1.48254	-10.7299
32220	32163	124480	2988.97	-1.48298	-10.7331
32240	32183	124516	2989.03	-1.48342	-10.7362
32260	32203	124553	2989.08	-1.48386	-10.7394
32280	32223	124590	2989.14	-1.48429	-10.7426
32300	32243	124626	2989.19	-1.48473	-10.7457
32320	32263	124663	2989.25	-1.48517	-10.7489
32340	32283	124699	2989.3	-1.4856	-10.752
32360	32303	124736	2989.35	-1.48604	-10.7552
32380	32323	124773	2989.41	-1.48647	-10.7584
32400	32343	124809	2989.46	-1.48691	-10.7615
32420	32363	124846	2989.52	-1.48734	-10.7647
32440	32383	124882	2989.57	-1.48778	-10.7678
32460	32403	124919	2989.63	-1.48821	-10.7709
32480	32423	124955	2989.68	-1.48865	-10.7741
32500	32443	124992	2989.74	-1.48908	-10.7772
32520	32463	125028	2989.79	-1.48952	-10.7804
32540	32483	125064	2989.84	-1.48995	-10.7835
32560	32503	125101	2989.9	-1.49038	-10.7867
32580	32523	125137	2989.95	-1.49082	-10.7898
32600	32543	125174	2990.01	-1.49125	-10.7929
32620	32563	125210	2990.06	-1.49168	-10.7961
32640	32583	125246	2990.11	-1.49211	-10.7992
32660	32603	125282	2990.17	-1.49255	-10.8023
32680	32623	125319	2990.22	-1.49298	-10.8054
32700	32643	125355	2990.28	-1.49341	-10.8086
32720	32663	125391	2990.33	-1.49384	-10.8117
32740	32683	125427	2990.38	-1.49427	-10.8148
32760	32703	125464	2990.44	-1.4947	-10.8179
32780	32723	125500	2990.49	-1.49514	-10.821
32800	32743	125536	2990.55	-1.49557	-10.8242
32820	32763	125572	2990.6	-1.496	-10.8273
32840	32783	125608	2990.65	-1.49643	-10.8304
32860	32803	125644	2990.71	-1.49686	-10.8335
32880	32823	125680	2990.76	-1.49729	-10.8366
32900	32843	125716	2990.81	-1.49772	-10.8397
32920	32863	125752	2990.87	-1.49814	-10.8428
32940	32883	125788	2990.92	-1.49857	-10.8459
32960	32903	125824	2990.98	-1.499	-10.849
32980	32923	125860	2991.03	-1.49943	-10.8521
33000	32943	125896	2991.08	-1.49986	-10.8552
33020	32963	125932	2991.14	-1.50029	-10.8583
33040	32983	125968	2991.19	-1.50071	-10.8614
33060	33003	126004	2991.24	-1.50114	-10.8645
33080	33023	126040	2991.3	-1.50157	-10.8676
33100	33043	126076	2991.35	-1.502	-10.8707
33120	33063	126111	2991.4	-1.50242	-10.8738
33140	33083	126147	2991.46	-1.50285	-10.8769
33160	33103	126183	2991.51	-1.50327	-10.88
33180	33123	126219	2991.56	-1.5037	-10.883
33200	33143	126254	2991.62	-1.50413	-10.8861
33220	33163	126290	2991.67	-1.50455	-10.8892
33240	33183	126326	2991.72	-1.50498	-10.8923
33260	33203	126361	2991.78	-1.5054	-10.8953
33280	33223	126397	2991.83	-1.50583	-10.8984
33300	33243	126433	2991.88	-1.50625	-10.9015
33320	33263	126468	2991.93	-1.50668	-10.9046
33340	33283	126504	2991.99	-1.5071	-10.9076
33360	33303	126540	2992.04	-1.50752	-10.9107
33380	33323	126575	2992.09	-1.50795	-10.9138
33400	33343	126611	2992.15	-1.50837	-10.9168
33420	33363	126646	2992.2	-1.50879	-10.9199
33440	33383	126682	2992.25	-1.50922	-10.923
33460	33403	126717	2992.3	-1.50964	-10.926
33480	33423	126753	2992.36	-1.51006	-10.9291
33500	33443	126788	2992.41	-1.51048	-10.9321
33520	33463	126823	2992.46	-1.51091	-10.9352
33540	33483	126859	2992.52	-1.51133	-10.9382
33560	33503	126894	2992.57	-1.51175	-10.9413
33580	33523	126930	2992.62	-1.51217	-10.9443
33600	33543	126965	2992.67	-1.51259	-10.9474
33620	33563	127000	2992.73	-1.51301	-10.9504
33640	33583	127035	2992.78	-1.51343	-10.9535
33660	33603	127071	2992.83	-1.51385	-10.9565
33680	33623	127106	2992.88	-1.51427	-10.9595
33700	33643	127141	2992.94	-1.51469	-10.9626
33720	33663	127176	2992.99	-1.51511	-10.9656
33740	33683	127212	2993.04	-1.51553	-10.9687
33760	33703	127247	2993.09	-1.51595	-10.9717
33780	33723	127282	2993.15	-1.51637	-10.9747
33800	33743	127317	2993.2	-1.51679	-10.9777
33820	33763	127352	2993.25	-1.51721	-10.9808
33840	33783	127387	2993.3	-1.51762	-10.9838
33860	33803	127422	2993.36	-1.51804	-10.9868
33880	33823	127457	2993.41	-1.51846	-10.9898
33900	33843	127492	2993.46	-1.51888	-10.9929
33920	33863	127528	2993.51	-1.51929	-10.9959
33940	33883	127563	2993.56	-1.51971	-10.9989
33960	33903	127597	2993.62	-1.52013	-11.0019
33980	33923	127632	2993.67	-1.52054	-11.0049
34000	33943	127667	2993.72	-1.52096	-11.0079
34020	33963	127702	2993.77	-1.52138	-11.011
34040	33983	127737	2993.82	-1.52179	-11.014
34060	34003	127772	2993.88	-1.52221	-11.017
34080	34023	127807	2993.93	-1.52262	-11.02
34100	34043	127842	2993.98	-1.52304	-11.023
34120	34063	127877	2994.03	-1.52345	-11.026
34140	34083	127911	2994.08	-1.52387	-11.029
34160	34103	127946	2994.14	-1.52428	-11.032
34180	34123	127981	2994.19	-1.5247	-11.035
34200	34143	128016	2994.24	-1.52511	-11.038
34220	34163	128050	2994.29	-1.52552	-11.041
34240	34183	128085	2994.34	-1.52594	-11.044
34260	34203	128120	2994.39	-1.52635	-11.047
34280	34223	128154	2994.45	-1.52676	-11.0499
34300	34243	128189	2994.5	-1.52718	-11.0529
34320	34263	128224	2994.55	-1.52759	-11.0559
34340	34283	128258	2994.6	-1.528	-11.0589
34360	34303	128293	2994.65	-1.52841	-11.0619
34380	34323	128327	2994.7	-1.52882	-11.0649
34400	34343	128362	2994.75	-1.52924	-11.0678
34420	34363	128397	2994.81	-1.52965	-11.0708
34440	34383	128431	2994.86	-1.53006	-11.0738
34460	34403	128466	2994.91	-1.53047	-11.0768
34480	34423	128500	2994.96	-1.53088	-11.0797
34500	34443	128534	2995.01	-1.53129	-11.0827
34520	34463	128569	2995.06	-1.5317	-11.0857
34540	34483	128603	2995.11	-1.53211	-11.0886
34560	34503	128638	2995.16	-1.53252	-11.0916
34580	34523	128672	2995.22	-1.53293	-11.0946
34600	34543	128706	2995.27	-1.53334	-11.0975
34620	34563	128741	2995.32	-1.53375	-11.1005
34640	34583	128775	2995.37	-1.53416	-11.1035
34660	34603	128809	2995.42	-1.53456	-11.1064
34680	34623	128844	2995.47	-1.53497	-11.1094
34700	34643	128878	2995.52	-1.53538	-11.1123
34720	34663	128912	2995.57	-1.53579	-11.1153
34740	34683	128946	2995.62	-1.5362	-11.1182
34760	34703	128981	2995.68	-1.5366	-11.1212
34780	34723	129015	2995.73	-1.53701	-11.1241
34800	34743	129049	2995.78	-1.53742	-11.1271
34820	34763	129083	2995.83	-1.53783	-11.13
34840	34783	129117	2995.88	-1.53823	-11.133
34860	34803	129151	2995.93	-1.53864	-11.1359
34880	34823	129185	2995.98	-1.53904	-11.1388
34900	34843	129219	2996.03	-1.53945	-11.1418
34920	34863	129253	2996.08	-1.53986	-11.1447
34940	34883	129287	2996.13	-1.54026	-11.1476
34960	34903	129321	2996.18	-1.54067	-11.1506
34980	34923	129355	2996.23	-1.54107	-11.1535
35000	34943	129389	2996.28	-1.54148	-11.1564
35020	34963	129423	2996.33	-1.54188	-11.1594
35040	34983	129457	2996.39	-1.54228	-11.1623
35060	35003	129491	2996.44	-1.54269	-11.1652
35080	35023	129525	2996.49	-1.54309	-11.1681
35100	35043	129559	2996.54	-1.5435	-11.171
35120	35063	129593	2996.59	-1.5439	-11.174
35140	35083	129627	2996.64	-1.5443	-11.1769
35160	35103	129660	2996.69	-1.5447	-11.1798
35180	35123	129694	2996.74	-1.54511	-11.1827
35200	35143	129728	2996.79	-1.54551	-11.1856
35220	35163	129762	2996.84	-1.54591	-11.1885
35240	35183	129796	2996.89	-1.54631	-11.1914
35260	35203	129829	2996.94	-1.54672	-11.1944
35280	35223	129863	2996.99	-1.54712	-11.1973
35300	35243	129897	2997.04	-1.54752	-11.2002
35320	35263	129930	2997.09	-1.54792	-11.2031
35340	35283	129964	2997.14	-1.54832	-11.206
35360	35303	129998	2997.19	-1.54872	-11.2089
35380	35323	130031	2997.24	-1.54912	-11.2118
35400	35343	130065	2997.29	-1.54952	-11.2147
35420	35363	130098	2997.34	-1.54992	-11.2176
35440	35383	130132	2997.39	-1.55032	-11.2204
35460	35403	130165	2997.44	-1.55072	-11.2233
35480	35423	130199	2997.49	-1.55112	-11.2262
35500	35443	130232	2997.54	-1.55152	-11.2291
35520	35463	130266	2997.59	-1.55192	-11.232
35540	35483	130299	2997.64	-1.55232	-11.2349
35560	35503	130333	2997.69	-1.55271	-11.2378
35580	35523	130366	2997.74	-1.55311	-11.2406
35600	35543	130400	2997.79	-1.55351	-11.2435
35620	35563	130433	2997.84	-1.55391	-11.2464
35640	35583	130466	2997.89	-1.55431	-11.2493
35660	35603	130500	2997.94	-1.5547	-11.2522
35680	35623	130533	2997.99	-1.5551	-11.255
35700	35643	130566	2998.04	-1.5555	-11.2579
35720	35663	130600	2998.09	-1.55589	-11.2608
35740	35683	130633	2998.14	-1.55629	-11.2636
35760	35703	130666	2998.19	-1.55669	-11.2665
35780	35723	130699	2998.24	-1.55708	-11.2694
35800	35743	130733	2998.28	-1.55748	-11.2722
35820	35763	130766	2998.33	-1.55787	-11.2751
35840	35783	130799	2998.38	-1.55827	-11.278
35860	35803	130832	2998.43	-1.55866	-11.2808
35880	35823	130865	2998.48	-1.55906	-11.2837
35900	35843	130898	2998.53	-1.55945	-11.2865
35920	35863	130931	2998.58	-1.55985	-11.2894
35940	35883	130964	2998.63	-1.56024	-11.2922
35960	35903	130998	2998.68	-1.56063	-11.2951
35980	35923	131031	2998.73	-1.56103	-11.2979
36000	35943	131064	2998.78	-1.56142	-11.3008
36020	35963	131097	2998.83	-1.56181	-11.3036
36040	35983	131130	2998.88	-1.56221	-11.3065
36060	36003	131163	2998.92	-1.5626	-11.3093
36080	36023	131196	2998.97	-1.56299	-11.3122
36100	36043	131228	2999.02	-1.56338	-11.315
36120	36063	131261	2999.07	-1.56378	-11.3178
36140	36083	131294	2999.12	-1.56417	-11.3207
36160	36103	131327	2999.17	-1.56456	-11.3235
36180	36123	131360	2999.22	-1.56495	-11.3263
36200	36143	131393	2999.27	-1.56534	-11.3292
36220	36163	131426	2999.32	-1.56573	-11.332
36240	36183	131458	2999.37	-1.56612	-11.3348
36260	36203	131491	2999.41	-1.56652	-11.3377
36280	36223	131524	2999.46	-1.56691	-11.3405
36300	36243	131557	2999.51	-1.5673	-11.3433
36320	36263	131589	2999.56	-1.56769	-11.3461
36340	36283	131622	2999.61	-1.56808	-11.3489
36360	36303	131655	2999.66	-1.56846	-11.3518
36380	36323	131688	2999.71	-1.56885	-11.3546
36400	36343	131720	2999.76	-1.56924	-11.3574
36420	36363	131753	2999.8	-1.56963	-11.3602
36440	36383	131785	2999.85	-1.57002	-11.363
36460	36403	131818	2999.9	-1.57041	-11.3658
36480	36423	131851	2999.95	-1.5708	-11.3686
36500	36443	131883	3000	-1.57118	-11.3715
36520	36463	131916	3000.05	-1.57157	-11.3743
36540	36483	131948	3000.1	-1.57196	-11.3771
36560	36503	131981	3000.14	-1.57235	-11.3799
36580	36523	132013	3000.19	-1.57273	-11.3827
36600	36543	132046	3000.24	-1.57312	-11.3855
36620	36563	132078	3000.29	-1.57351	-11.3883
36640	36583	132111	3000.34	-1.57389	-11.3911
36660	36603	132143	3000.39	-1.57428	-11.3939
36680	36623	132175	3000.43	-1.57467	-11.3966
36700	36643	132208	3000.48	-1.57505	-11.3994
36720	36663	132240	3000.53	-1.57544	-11.4022
36740	36683	132273	3000.58	-1.57582	-11.405
36760	36703	132305	3000.63	-1.57621	-11.4078
36780	36723	132337	3000.67	-1.57659	-11.4106
36800	36743	132369	3000.72	-1.57698	-11.4134
36820	36763	132402	3000.77	-1.57736	-11.4162
36840	36783	132434	3000.82	-1.57775	-11.4189
36860	36803	132466	3000.87	-1.57813	-11.4217
36880	36823	132498	3000.91	-1.57851	-11.4245
36900	36843	132531	3000.96	-1.5789	-11.4273
36920	36863	132563	3001.01	-1.57928	-11.43
36940	36883	132595	3001.06	-1.57966	-11.4328
36960	36903	132627	3001.11	-1.58005	-11.4356
36980	36923	132659	3001.15	-1.58043	-11.4384
37000	36943	132691	3001.2	-1.58081	-11.4411
37020	36963	132723	3001.25	-1.58119	-11.4439
37040	36983	132755	3001.3	-1.58158	-11.4467
37060	37003	132788	3001.34	-1.58196	-11.4494
37080	37023	132820	3001.39	-1.58234	-11.4522
37100	37043	132852	3001.44	-1.58272	-11.4549
37120	37063	132884	3001.49	-1.5831	-11.4577
37140	37083	132916	3001.54	-1.58348	-11.4605
37160	37103	132948	3001.58	-1.58386	-11.4632
37180	37123	132979	3001.63	-1.58425	-11.466
37200	37143	133011	3001.68	-1.58463	-11.4687
37220	37163	133043	3001.73	-1.58501	-11.4715
37240	37183	133075	3001.77	-1.58539	-11.4742
37260	37203	133107	3001.82	-1.58577	-11.477
37280	37223	133139	3001.87	-1.58614	-11.4797
37300	37243	133171	3001.92	-1.58652	-11.4825
37320	37263	133203	3001.96	-1.5869	-11.4852
37340	37283	133234	3002.01	-1.58728	-11.488
37360	37303	133266	3002.06	-1.58766	-11.4907
37380	37323	133298	3002.1	-1.58804	-11.4934
37400	37343	133330	3002.15	-1.58842	-11.4962
37420	37363	133361	3002.2	-1.5888	-11.4989
37440	37383	133393	3002.25	-1.58917	-11.5016
37460	37403	133425	3002.29	-1.58955	-11.5044
37480	37423	133456	3002.34	-1.58993	-11.5071
37500	37443	133488	3002.39	-1.59031	-11.5098
37520	37463	133520	3002.44	-1.59068	-11.5126
37540	37483	133551	3002.48	-1.59106	-11.5153
37560	37503	133583	3002.53	-1.59144	-11.518
37580	37523	133615	3002.58	-1.59181	-11.5207
37600	37543	133646	3002.62	-1.59219	-11.5235
37620	37563	133678	3002.67	-1.59256	-11.5262
37640	37583	133709	3002.72	-1.59294	-11.5289
37660	37603	133741	3002.76	-1.59331	-11.5316
37680	37623	133772	3002.81	-1.59369	-11.5343
37700	37643	133804	3002.86	-1.59406	-11.537
37720	37663	133835	3002.9	-1.59444	-11.5398
37740	37683	133867	3002.95	-1.59481	-11.5425
37760	37703	133898	3003	-1.59519	-11.5452
37780	37723	133929	3003.05	-1.59556	-11.5479
37800	37743	133961	3003.09	-1.59594	-11.5506
37820	37763	133992	3003.14	-1.59631	-11.5533
37840	37783	134024	3003.19	-1.59668	-11.556
37860	37803	134055	3003.23	-1.59706	-11.5587
37880	37823	134086	3003.28	-1.59743	-11.5614
37900	37843	134118	3003.33	-1.5978	-11.5641
37920	37863	134149	3003.37	-1.59818	-11.5668
37940	37883	134180	3003.42	-1.59855	-11.5695
37960	37903	134211	3003.47	-1.59892	-11.5722
37980	37923	134243	3003.51	-1.59929	-11.5749
38000	37943	134274	3003.56	-1.59966	-11.5776
38020	37963	134305	3003.6	-1.60004	-11.5803
38040	37983	134336	3003.65	-1.60041	-11.583
38060	38003	134367	3003.7	-1.60078	-11.5856
38080	38023	134398	3003.74	-1.60115	-11.5883
38100	38043	134430	3003.79	-1.60152	-11.591
38120	38063	134461	3003.84	-1.60189	-11.5937
38140	38083	134492	3003.88	-1.60226	-11.5964
38160	38103	134523	3003.93	-1.60263	-11.5991
38180	38123	134554	3003.98	-1.603	-11.6017
38200	38143	134585	3004.02	-1.60337	-11.6044
38220	38163	134616	3004.07	-1.60374	-11.6071
38240	38183	134647	3004.11	-1.60411	-11.6098
38260	38203	134678	3004.16	-1.60448	-11.6124
38280	38223	134709	3004.21	-1.60485	-11.6151
38300	38243	134740	3004.25	-1.60522	-11.6178
38320	38263	134771	3004.3	-1.60559	-11.6204
38340	38283	134802	3004.34	-1.60595	-11.6231
38360	38303	134833	3004.39	-1.60632	-11.6258
38380	38323	134864	3004.44	-1.60669	-11.6284
38400	38343	134894	3004.48	-1.60706	-11.6311
38420	38363	134925	3004.53	-1.60743	-11.6337
38440	38383	134956	3004.57	-1.60779	-11.6364
38460	38403	134987	3004.62	-1.60816	-11.6391
38480	38423	135018	3004.67	-1.60853	-11.6417
38500	38443	135048	3004.71	-1.60889	-11.6444
38520	38463	135079	3004.76	-1.60926	-11.647
38540	38483	135110	3004.8	-1.60963	-11.6497
38560	38503	135141	3004.85	-1.60999	-11.6523
38580	38523	135171	3004.89	-1.61036	-11.655
38600	38543	135202	3004.94	-1.61072	-11.6576
38620	38563	135233	3004.99	-1.61109	-11.6603
38640	38583	135263	3005.03	-1.61145	-11.6629
38660	38603	135294	3005.08	-1.61182	-11.6655
38680	38623	135325	3005.12	-1.61218	-11.6682
38700	38643	135355	3005.17	-1.61255	-11.6708
38720	38663	135386	3005.21	-1.61291	-11.6735
38740	38683	135416	3005.26	-1.61328	-11.6761
38760	38703	135447	3005.31	-1.61364	-11.6787
38780	38723	135478	3005.35	-1.61401	-11.6814
38800	38743	135508	3005.4	-1.61437	-11.684
38820	38763	135539	3005.44	-1.61473	-11.6866
38840	38783	135569	3005.49	-1.6151	-11.6893
38860	38803	135599	3005.53	-1.61546	-11.6919
38880	38823	135630	3005.58	-1.61582	-11.6945
38900	38843	135660	3005.62	-1.61618	-11.6971
38920	38863	135691	3005.67	-1.61655	-11.6998
38940	38883	135721	3005.71	-1.61691	-11.7024
38960	38903	135752	3005.76	-1.61727	-11.705
38980	38923	135782	3005.8	-1.61763	-11.7076
39000	38943	135812	3005.85	-1.61799	-11.7102
39020	38963	135843	3005.89	-1.61836	-11.7128
39040	38983	135873	3005.94	-1.61872	-11.7155
39060	39003	135903	3005.98	-1.61908	-11.7181
39080	39023	135933	3006.03	-1.61944	-11.7207
39100	39043	135964	3006.07	-1.6198	-11.7233
39120	39063	135994	3006.12	-1.62016	-11.7259
39140	39083	136024	3006.16	-1.62052	-11.7285
39160	39103	136054	3006.21	-1.62088	-11.7311
39180	39123	136085	3006.25	-1.62124	-11.7337
39200	39143	136115	3006.3	-1.6216	-11.7363
39220	39163	136145	3006.34	-1.62196	-11.7389
39240	39183	136175	3006.39	-1.62232	-11.7415
39260	39203	136205	3006.43	-1.62268	-11.7441
39280	39223	136235	3006.48	-1.62303	-11.7467
39300	39243	136265	3006.52	-1.62339	-11.7493
39320	39263	136296	3006.57	-1.62375	-11.7519
39340	39283	136326	3006.61	-1.62411	-11.7545
39360	39303	136356	3006.66	-1.62447	-11.7571
39380	39323	136386	3006.7	-1.62482	-11.7597
39400	39343	136416	3006.75	-1.62518	-11.7623
39420	39363	136446	3006.79	-1.62554	-11.7648
39440	39383	136476	3006.84	-1.6259	-11.7674
39460	39403	136506	3006.88	-1.62625	-11.77
39480	39423	136536	3006.93	-1.62661	-11.7726
39500	39443	136565	3006.97	-1.62697	-11.7752
39520	39463	136595	3007.02	-1.62732	-11.7777
39540	39483	136625	3007.06	-1.62768	-11.7803
39560	39503	136655	3007.1	-1.62803	-11.7829
39580	39523	136685	3007.15	-1.62839	-11.7855
39600	39543	136715	3007.19	-1.62875	-11.788
39620	39563	136745	3007.24	-1.6291	-11.7906
39640	39583	136774	3007.28	-1.62946	-11.7932
39660	39603	136804	3007.33	-1.62981	-11.7958
39680	39623	136834	3007.37	-1.63017	-11.7983
39700	39643	136864	3007.42	-1.63052	-11.8009
39720	39663	136893	3007.46	-1.63087	-11.8035
39740	39683	136923	3007.5	-1.63123	-11.806
39760	39703	136953	3007.55	-1.63158	-11.8086
39780	39723	136983	3007.59	-1.63194	-11.8111
39800	39743	137012	3007.64	-1.63229	-11.8137
39820	39763	137042	3007.68	-1.63264	-11.8163
39840	39783	137072	3007.72	-1.633	-11.8188
39860	39803	137101	3007.77	-1.63335	-11.8214
39880	39823	137131	3007.81	-1.6337	-11.8239
39900	39843	137160	3007.86	-1.63405	-11.8265
39920	39863	137190	3007.9	-1.63441	-11.829
39940	39883	137219	3007.94	-1.63476	-11.8316
39960	39903	137249	3007.99	-1.63511	-11.8341
[truncated: 752 more rows]
